# Supplementary material for: Highly enantioselective Michael addition of 3-arylthio- and 3-alkylthiooxindoles to nitroolefins catalyzed by a simple cinchona alkaloid derived phosphoramide
Source: Royal Society of Chemistry journal article supplement (doi:10.1039/c4cc06417h), 2014-10-22
Supplement: c4cc06417h3.pdf [file c4cc06417h3.pdf]

## Highly enantioselective Michael addition of 3-arylthio- and 3-alkylthiooxindoles to nitroolefins catalyzed by a simple cinchona alkaloid derived phosphoramidate

Wei-Ming Gao, Jin-Sheng Yu, Yu-Lei Zhao, Yun-Lin Liu, Feng Zhou, Hai-Hong Wu\* and Jian Zhou\*

*Shanghai Key Laboratory of Green Chemistry and Chemical Processes, Department of Chemistry, East China Normal University, 3663N Zhongshan Road, Shanghai 200062, China.*

### Supporting Information

#### (Part III)

| <b>Content</b>                        | <b>Page</b> |
|---------------------------------------|-------------|
| <b>HPLC spectra of products 3a-3u</b> | <b>2-22</b> |

### 404 GWM-GE-115-2-RAC-ADH-85/15-1.0-230

Sample Name: GWM-GE-115-2-RAC-ADH-85/15-1.0-230 Injection Volume: 20.0  
 Vial Number: 502 Channel: UV\_VIS\_1  
 Sample Type: standard Wavelength: 230  
 Control Program: Gao Weiming Bandwidth: n.a.  
 Quantif. Method: Gao Weiming Dilution Factor: 1.0000  
 Recording Time: 2014-2-27 17:17 Sample Weight: 1.0000  
 Run Time (min): 27.73 Sample Amount: 1.0000

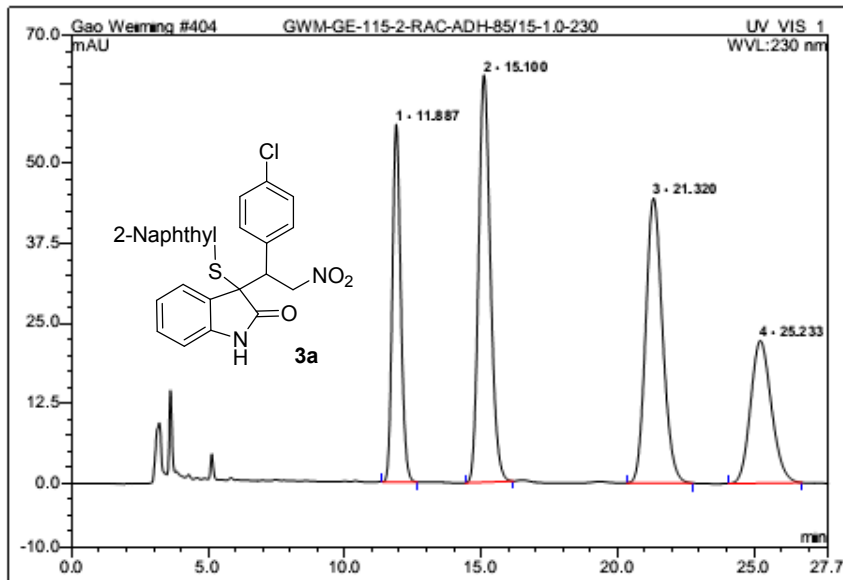

| No.    | Ret.Time min | Peak Name | Height mAU | Area mAU*min | Rel.Area % | Amount | Type |
|--------|--------------|-----------|------------|--------------|------------|--------|------|
| 1      | 11.89        | n.a.      | 56.024     | 20.008       | 19.28      | n.a.   | BMB  |
| 2      | 15.10        | n.a.      | 63.785     | 31.967       | 30.80      | n.a.   | BMB  |
| 3      | 21.32        | n.a.      | 44.614     | 31.995       | 30.82      | n.a.   | BMB  |
| 4      | 25.23        | n.a.      | 22.329     | 19.827       | 19.10      | n.a.   | BMB  |
| Total: |              |           | 186.752    | 103.798      | 100.00     | 0.000  |      |

### 403 GWM-GE-115-2-ASY-ADH-85/15-1.0-230

Sample Name: GWM-GE-115-2-ASY-ADH-85/15-1.0-230 Injection Volume: 20.0  
 Vial Number: 501 Channel: UV\_VIS\_1  
 Sample Type: standard Wavelength: 230  
 Control Program: Gao Weiming Bandwidth: n.a.  
 Quantif. Method: Gao Weiming Dilution Factor: 1.0000  
 Recording Time: 2014-2-27 16:43 Sample Weight: 1.0000  
 Run Time (min): 29.84 Sample Amount: 1.0000

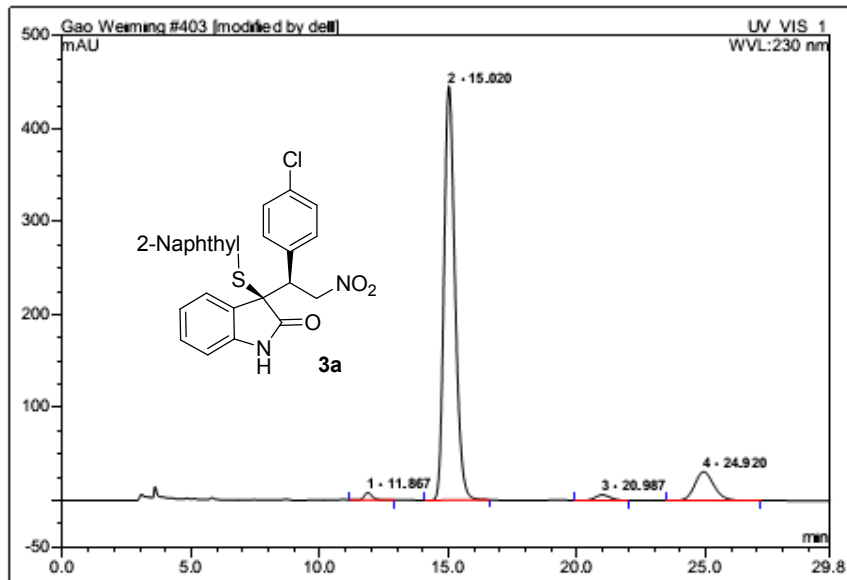

| No.    | Ret.Time min | Peak Name | Height mAU | Area mAU*min | Rel.Area % | Amount | Type |
|--------|--------------|-----------|------------|--------------|------------|--------|------|
| 1      | 11.87        | n.a.      | 7.742      | 2.767        | 1.09       | n.a.   | BMB* |
| 2      | 15.02        | n.a.      | 445.844    | 219.937      | 86.90      | n.a.   | BMB* |
| 3      | 20.99        | n.a.      | 5.994      | 3.943        | 1.56       | n.a.   | BMB* |
| 4      | 24.92        | n.a.      | 30.931     | 26.455       | 10.45      | n.a.   | BMB* |
| Total: |              |           | 490.510    | 253.102      | 100.00     | 0.000  |      |

### 356 GWM-GE-091-4-RAC-IF-85/15-1.0-230

Sample Name: GWM-GE-091-4-RAC-IF-85/15-1.0-230 Injection Volume: 20.0  
 Vial Number: 454 Channel: UV\_VIS\_1  
 Sample Type: standard Wavelength: 230  
 Control Program: Gao Weiming Bandwidth: n.a.  
 Quantif. Method: Gao Weiming Dilution Factor: 1.0000  
 Recording Time: 2014-1-20 11:27 Sample Weight: 1.0000  
 Run Time (min): 26.45 Sample Amount: 1.0000

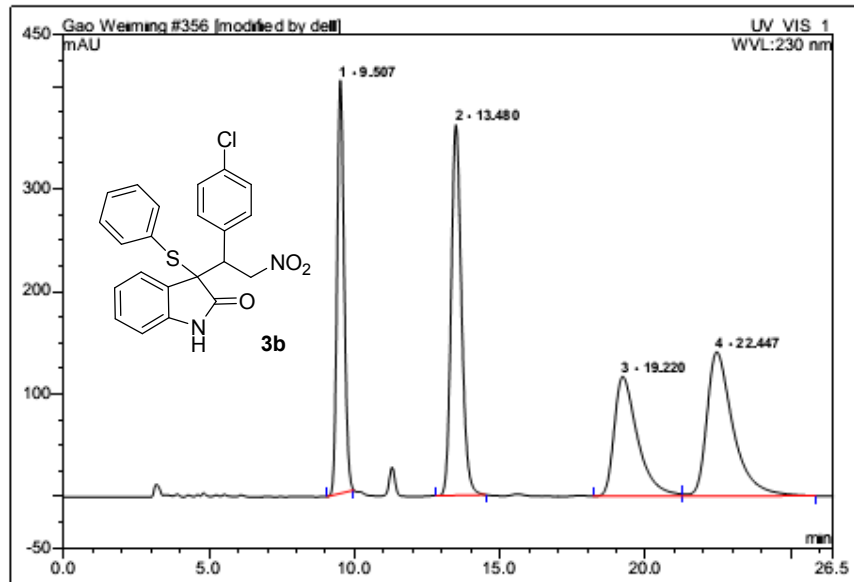

| No.    | Ret.Time min | Peak Name | Height mAU | Area mAU*min | Rel.Area % | Amount | Type |
|--------|--------------|-----------|------------|--------------|------------|--------|------|
| 1      | 9.51         | n.a.      | 403.004    | 112.608      | 21.75      | n.a.   | BMB* |
| 2      | 13.48        | n.a.      | 361.448    | 148.221      | 28.63      | n.a.   | BMB* |
| 3      | 19.22        | n.a.      | 116.623    | 109.035      | 21.06      | n.a.   | BM * |
| 4      | 22.45        | n.a.      | 140.650    | 147.758      | 28.55      | n.a.   | MB*  |
| Total: |              |           | 1021.725   | 517.623      | 100.00     | 0.000  |      |

### 355 GWM-GE-091-4-ASY-IF-85/15-1.0-230

Sample Name: GWM-GE-091-4-ASY-IF-85/15-1.0-230 Injection Volume: 20.0  
 Vial Number: 453 Channel: UV\_VIS\_1  
 Sample Type: standard Wavelength: 230  
 Control Program: Gao Weiming Bandwidth: n.a.  
 Quantif. Method: Gao Weiming Dilution Factor: 1.0000  
 Recording Time: 2014-1-20 10:56 Sample Weight: 1.0000  
 Run Time (min): 26.49 Sample Amount: 1.0000

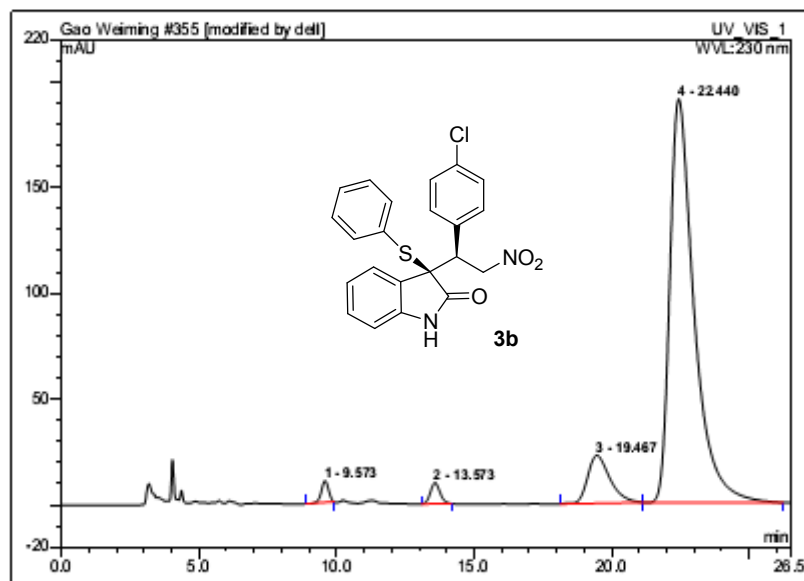

| No.    | Ret.Time min | Peak Name | Height mAU | Area mAU*min | Rel.Area % | Amount | Type |
|--------|--------------|-----------|------------|--------------|------------|--------|------|
| 1      | 9.57         | n.a.      | 10.212     | 3.112        | 1.39       | n.a.   | BMB* |
| 2      | 13.57        | n.a.      | 9.814      | 3.984        | 1.78       | n.a.   | BMB* |
| 3      | 19.47        | n.a.      | 22.532     | 21.061       | 9.43       | n.a.   | BMB* |
| 4      | 22.44        | n.a.      | 190.718    | 195.248      | 87.40      | n.a.   | bMB* |
| Total: |              |           | 233.276    | 223.404      | 100.00     | 0.000  |      |

### 362 GWM-GE-091-5-RAC-IF-90/10-1.0-230

Sample Name: GWM-GE-091-5-RAC-IF-90/10-1.0-230 Injection Volume: 20.0  
 Vial Number: 460 Channel: UV\_VIS\_1  
 Sample Type: standard Wavelength: 230  
 Control Program: Gao Weiming Bandwidth: n.a.  
 Quantif. Method: Gao Weiming Dilution Factor: 1.0000  
 Recording Time: 2014-1-20 21:33 Sample Weight: 1.0000  
 Run Time (min): 38.96 Sample Amount: 1.0000

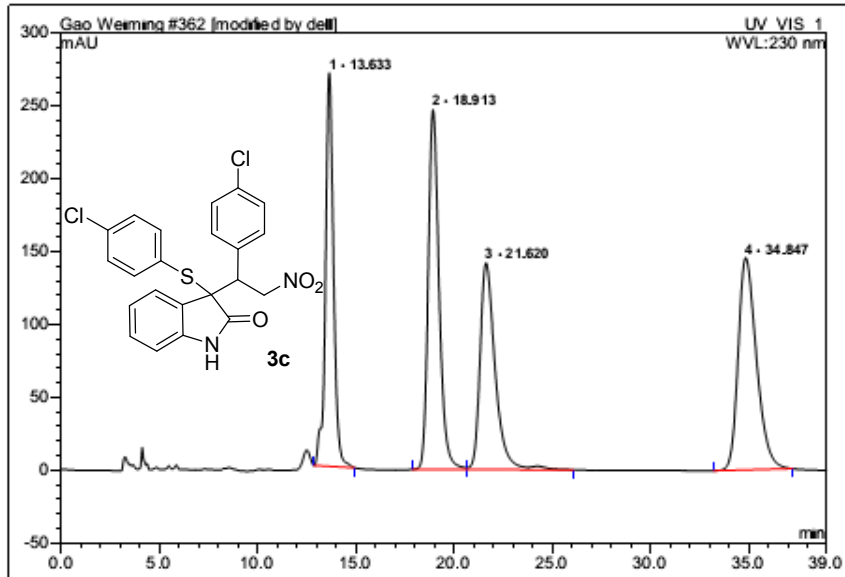

| No.    | Ret.Time min | Peak Name | Height mAU | Area mAU*min | Rel.Area % | Amount | Type |
|--------|--------------|-----------|------------|--------------|------------|--------|------|
| 1      | 13.63        | n.a.      | 270.397    | 129.101      | 22.55      | n.a.   | BMB* |
| 2      | 18.91        | n.a.      | 247.265    | 158.687      | 27.72      | n.a.   | BM * |
| 3      | 21.62        | n.a.      | 141.992    | 127.054      | 22.19      | n.a.   | MB*  |
| 4      | 34.85        | n.a.      | 145.818    | 157.603      | 27.53      | n.a.   | BMB* |
| Total: |              |           | 805.473    | 572.445      | 100.00     | 0.000  |      |

### 361 GWM-GE-091-5-ASY-IF-90/10-1.0-230

Sample Name: GWM-GE-091-5-ASY-IF-90/10-1.0-230 Injection Volume: 20.0  
 Vial Number: 459 Channel: UV\_VIS\_1  
 Sample Type: standard Wavelength: 230  
 Control Program: Gao Weiming Bandwidth: n.a.  
 Quantif. Method: Gao Weiming Dilution Factor: 1.0000  
 Recording Time: 2014-1-20 19:46 Sample Weight: 1.0000  
 Run Time (min): 38.98 Sample Amount: 1.0000

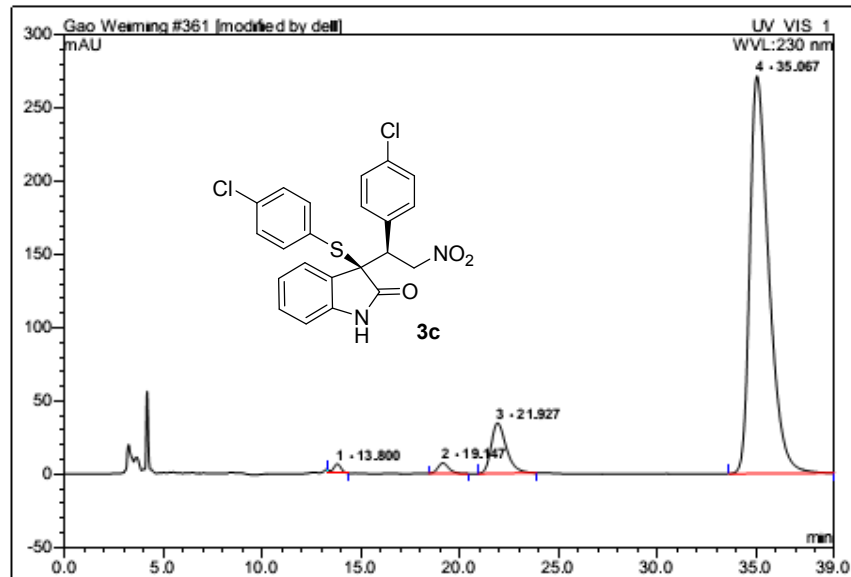

| No.    | Ret.Time min | Peak Name | Height mAU | Area mAU*min | Rel.Area % | Amount | Type |
|--------|--------------|-----------|------------|--------------|------------|--------|------|
| 1      | 13.80        | n.a.      | 6.239      | 2.947        | 0.86       | n.a.   | MB*  |
| 2      | 19.15        | n.a.      | 7.113      | 4.560        | 1.33       | n.a.   | BMB  |
| 3      | 21.93        | n.a.      | 34.484     | 30.699       | 8.98       | n.a.   | BMB* |
| 4      | 35.07        | n.a.      | 271.975    | 303.480      | 88.82      | n.a.   | BMB  |
| Total: |              |           | 319.810    | 341.685      | 100.00     | 0.000  |      |

### 471 GWM-GE-147-RAC-ADH-85/15-1.0-230

**Sample Name:** GWM-GE-147-RAC-ADH-85/15-1.0-230    **Injection Volume:** 20.0  
**Vial Number:** 569    **Channel:** UV\_VIS\_1  
**Sample Type:** standard    **Wavelength:** 230  
**Control Program:** Gao Weiming    **Bandwidth:** n.a.  
**Quantif. Method:** Gao Weiming    **Dilution Factor:** 1.0000  
**Recording Time:** 2014-3-14 22:57    **Sample Weight:** 1.0000  
**Run Time (min):** 33.00    **Sample Amount:** 1.0000

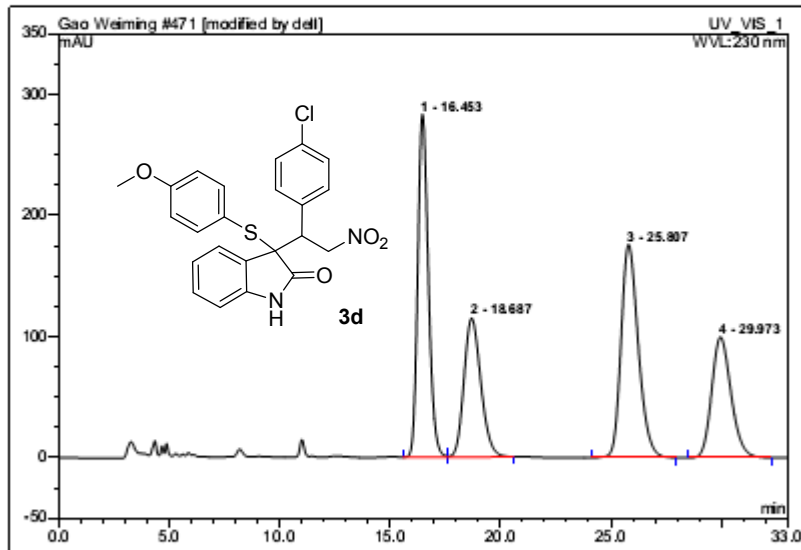

| No.           | Ret.Time<br>min | Peak Name | Height<br>mAU | Area<br>mAU*min | Rel.Area<br>% | Amount | Type |
|---------------|-----------------|-----------|---------------|-----------------|---------------|--------|------|
| 1             | 16.45           | n.a.      | 283.088       | 157.691         | 30.29         | n.a.   | BM   |
| 2             | 18.69           | n.a.      | 114.543       | 101.818         | 19.56         | n.a.   | MB   |
| 3             | 25.81           | n.a.      | 175.965       | 159.199         | 30.58         | n.a.   | BMB  |
| 4             | 29.97           | n.a.      | 99.683        | 101.850         | 19.57         | n.a.   | BMB  |
| <b>Total:</b> |                 |           | 673.278       | 520.558         | 100.00        | 0.000  |      |

### 470 GWM-GE-147-ASY-ADH-85/15-1.0-230

**Sample Name:** GWM-GE-147-ASY-ADH-85/15-1.0-230    **Injection Volume:** 20.0  
**Vial Number:** 568    **Channel:** UV\_VIS\_1  
**Sample Type:** standard    **Wavelength:** 230  
**Control Program:** Gao Weiming    **Bandwidth:** n.a.  
**Quantif. Method:** Gao Weiming    **Dilution Factor:** 1.0000  
**Recording Time:** 2014-3-14 22:21    **Sample Weight:** 1.0000  
**Run Time (min):** 33.34    **Sample Amount:** 1.0000

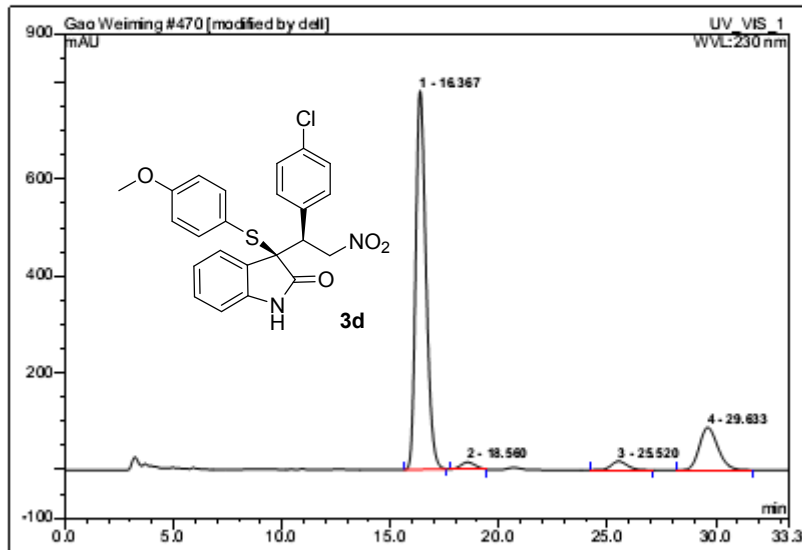

| No.           | Ret.Time<br>min | Peak Name | Height<br>mAU | Area<br>mAU*min | Rel.Area<br>% | Amount | Type |
|---------------|-----------------|-----------|---------------|-----------------|---------------|--------|------|
| 1             | 16.37           | n.a.      | 781.569       | 429.982         | 78.95         | n.a.   | BMB* |
| 2             | 18.56           | n.a.      | 14.225        | 10.770          | 1.98          | n.a.   | BMB* |
| 3             | 25.52           | n.a.      | 18.307        | 15.882          | 2.92          | n.a.   | BMB* |
| 4             | 29.63           | n.a.      | 88.060        | 87.999          | 16.16         | n.a.   | BMB* |
| <b>Total:</b> |                 |           | 902.160       | 544.633         | 100.00        | 0.000  |      |

### 466 GWM-GE-149-RAC-OZH-95/5-1.0-230

**Sample Name:** GWM-GE-149-RAC-OZH-95/5-1.0-230    **Injection Volume:** 20.0  
**Vial Number:** 564    **Channel:** UV\_VIS\_1  
**Sample Type:** standard    **Wavelength:** 230  
**Control Program:** Gao Weiming    **Bandwidth:** n.a.  
**Quantif. Method:** Gao Weiming    **Dilution Factor:** 1.0000  
**Recording Time:** 2014-3-14 15:51    **Sample Weight:** 1.0000  
**Run Time (min):** 26.15    **Sample Amount:** 1.0000

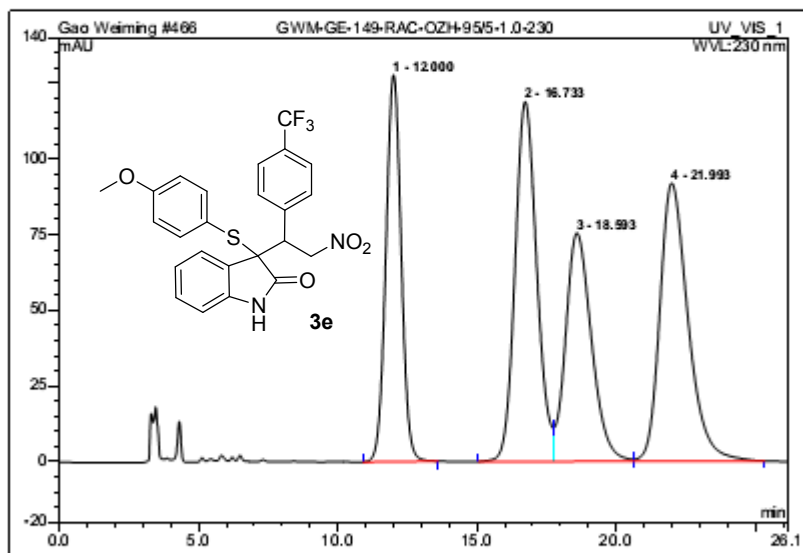

| No.           | Ret.Time<br>min | Peak Name | Height<br>mAU | Area<br>mAU*min | Rel.Area<br>% | Amount | Type |
|---------------|-----------------|-----------|---------------|-----------------|---------------|--------|------|
| 1             | 12.00           | n.a.      | 127.688       | 81.266          | 21.51         | n.a.   | BMB  |
| 2             | 16.73           | n.a.      | 118.791       | 107.297         | 28.39         | n.a.   | BM   |
| 3             | 18.59           | n.a.      | 75.400        | 81.443          | 21.55         | n.a.   | M    |
| 4             | 21.99           | n.a.      | 91.806        | 107.873         | 28.55         | n.a.   | MB   |
| <b>Total:</b> |                 |           | 413.685       | 377.879         | 100.00        | 0.000  |      |

### 465 GWM-GE-149-ASY-OZH-95/5-1.0-230

**Sample Name:** GWM-GE-149-ASY-OZH-95/5-1.0-230    **Injection Volume:** 20.0  
**Vial Number:** 563    **Channel:** UV\_VIS\_1  
**Sample Type:** standard    **Wavelength:** 230  
**Control Program:** Gao Weiming    **Bandwidth:** n.a.  
**Quantif. Method:** Gao Weiming    **Dilution Factor:** 1.0000  
**Recording Time:** 2014-3-14 15:21    **Sample Weight:** 1.0000  
**Run Time (min):** 25.45    **Sample Amount:** 1.0000

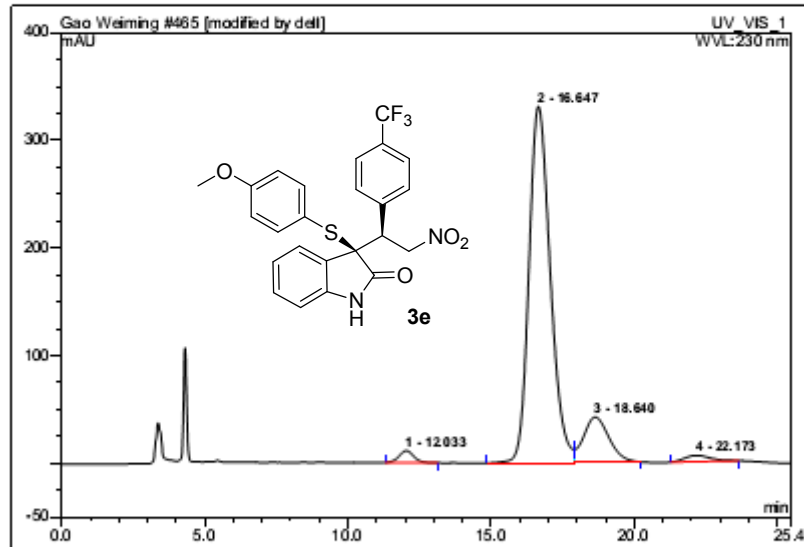

| No.           | Ret.Time<br>min | Peak Name | Height<br>mAU | Area<br>mAU*min | Rel.Area<br>% | Amount | Type |
|---------------|-----------------|-----------|---------------|-----------------|---------------|--------|------|
| 1             | 12.03           | n.a.      | 11.036        | 6.624           | 1.94          | n.a.   | BMB* |
| 2             | 16.65           | n.a.      | 331.162       | 285.968         | 83.77         | n.a.   | BM*  |
| 3             | 18.64           | n.a.      | 41.738        | 42.739          | 12.52         | n.a.   | MB*  |
| 4             | 22.17           | n.a.      | 5.765         | 6.042           | 1.77          | n.a.   | BMB* |
| <b>Total:</b> |                 |           | 389.701       | 341.373         | 100.00        | 0.000  |      |

### 459 GWM-GE-143-RAC-ADH-95/5-1.0-230

**Sample Name:** GWM-GE-143-RAC-ADH-95/5-1.0-230      **Injection Volume:** 20.0  
**Vial Number:** 557      **Channel:** UV\_VIS\_1  
**Sample Type:** standard      **Wavelength:** 230  
**Control Program:** Gao Weiming      **Bandwidth:** n.a.  
**Quantif. Method:** Gao Weiming      **Dilution Factor:** 1.0000  
**Recording Time:** 2014-3-13 22:31      **Sample Weight:** 1.0000  
**Run Time (min):** 76.36      **Sample Amount:** 1.0000

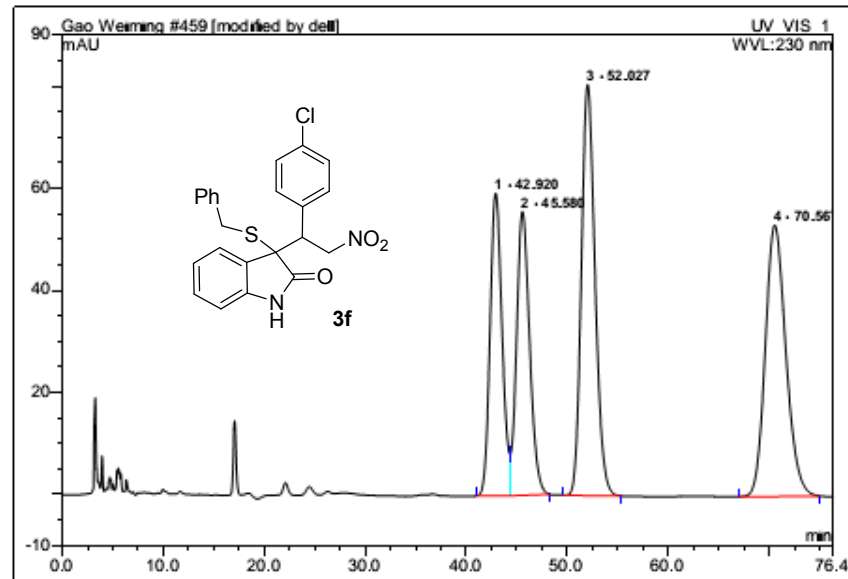

| No.           | Ret.Time<br>min | Peak Name | Height<br>mAU | Area<br>mAU*min | Rel.Area<br>% | Amount | Type |
|---------------|-----------------|-----------|---------------|-----------------|---------------|--------|------|
| 1             | 42.92           | n.a.      | 59.310        | 81.783          | 19.61         | n.a.   | BM*  |
| 2             | 45.58           | n.a.      | 55.621        | 83.559          | 20.03         | n.a.   | MB*  |
| 3             | 52.03           | n.a.      | 80.601        | 126.162         | 30.24         | n.a.   | BMB* |
| 4             | 70.57           | n.a.      | 53.163        | 125.638         | 30.12         | n.a.   | BMB* |
| <b>Total:</b> |                 |           | 248.696       | 417.141         | 100.00        | 0.000  |      |

### 458 GWM-GE-143-ASY-ADH-95/5-1.0-230

**Sample Name:** GWM-GE-143-ASY-ADH-95/5-1.0-230      **Injection Volume:** 20.0  
**Vial Number:** 556      **Channel:** UV\_VIS\_1  
**Sample Type:** standard      **Wavelength:** 230  
**Control Program:** Gao Weiming      **Bandwidth:** n.a.  
**Quantif. Method:** Gao Weiming      **Dilution Factor:** 1.0000  
**Recording Time:** 2014-3-13 21:13      **Sample Weight:** 1.0000  
**Run Time (min):** 75.27      **Sample Amount:** 1.0000

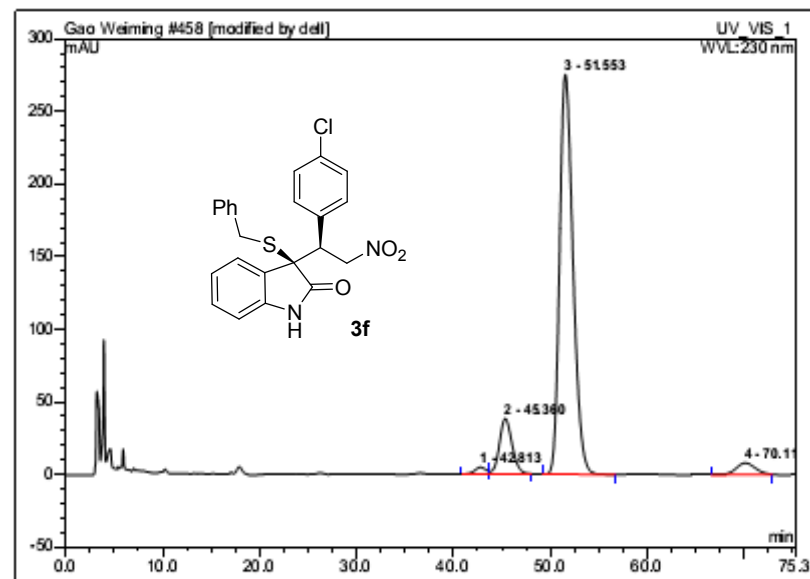

| No.           | Ret.Time<br>min | Peak Name | Height<br>mAU | Area<br>mAU*min | Rel.Area<br>% | Amount | Type |
|---------------|-----------------|-----------|---------------|-----------------|---------------|--------|------|
| 1             | 42.81           | n.a.      | 4.509         | 6.051           | 1.16          | n.a.   | BM*  |
| 2             | 45.36           | n.a.      | 38.054        | 57.826          | 11.05         | n.a.   | MB*  |
| 3             | 51.55           | n.a.      | 275.400       | 440.935         | 84.27         | n.a.   | BMB* |
| 4             | 70.11           | n.a.      | 8.019         | 18.425          | 3.52          | n.a.   | BMB* |
| <b>Total:</b> |                 |           | 325.982       | 523.237         | 100.00        | 0.000  |      |

### 473 GWM-GE-141-RAC-ADH-95/5-1.0-230

Sample Name: GWM-GE-141-RAC-ADH-95/5-1.0-230 Injection Volume: 20.0  
 Vial Number: 571 Channel: UV\_VIS\_1  
 Sample Type: standard Wavelength: 230  
 Control Program: Gao Weiming Bandwidth: n.a.  
 Quantif. Method: Gao Weiming Dilution Factor: 1.0000  
 Recording Time: 2014-3-15 0:49 Sample Weight: 1.0000  
 Run Time (min): 55.32 Sample Amount: 1.0000

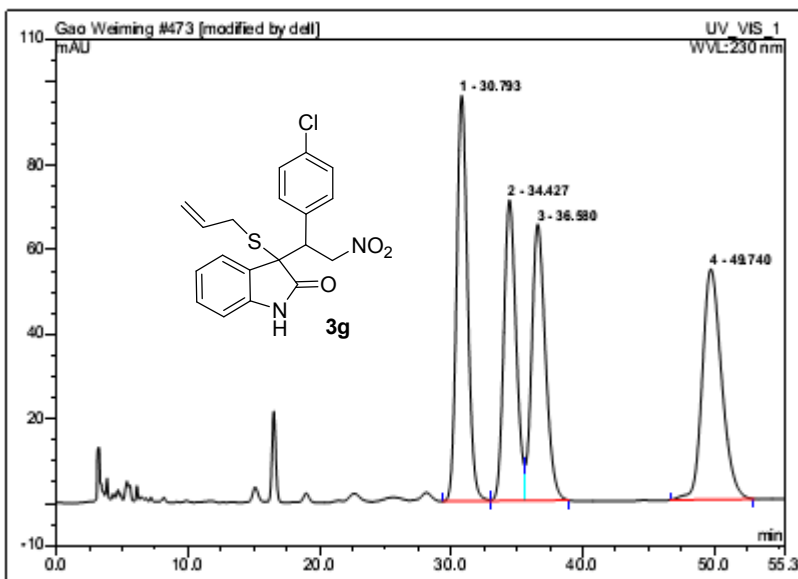

| No.    | Ret.Time<br>min | Peak Name | Height<br>mAU | Area<br>mAU*min | Rel.Area<br>% | Amount | Type |
|--------|-----------------|-----------|---------------|-----------------|---------------|--------|------|
| 1      | 30.79           | n.a.      | 96.109        | 92.926          | 27.15         | n.a.   | BM   |
| 2      | 34.43           | n.a.      | 71.257        | 77.316          | 22.59         | n.a.   | M    |
| 3      | 36.58           | n.a.      | 65.434        | 79.097          | 23.11         | n.a.   | MB   |
| 4      | 49.74           | n.a.      | 54.546        | 92.955          | 27.16         | n.a.   | BMB  |
| Total: |                 |           | 287.346       | 342.293         | 100.00        | 0.000  |      |

### 472 GWM-GE-141-ASY-ADH-95/5-1.0-230

Sample Name: GWM-GE-141-ASY-ADH-95/5-1.0-230 Injection Volume: 20.0  
 Vial Number: 570 Channel: UV\_VIS\_1  
 Sample Type: standard Wavelength: 230  
 Control Program: Gao Weiming Bandwidth: n.a.  
 Quantif. Method: Gao Weiming Dilution Factor: 1.0000  
 Recording Time: 2014-3-14 23:52 Sample Weight: 1.0000  
 Run Time (min): 53.82 Sample Amount: 1.0000

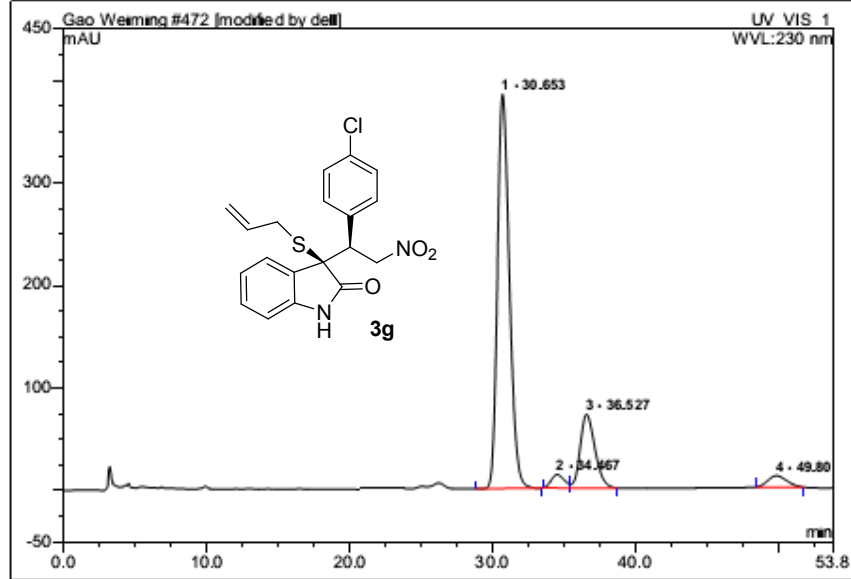

| No.    | Ret.Time<br>min | Peak Name | Height<br>mAU | Area<br>mAU*min | Rel.Area<br>% | Amount | Type |
|--------|-----------------|-----------|---------------|-----------------|---------------|--------|------|
| 1      | 30.65           | n.a.      | 384.700       | 371.785         | 76.04         | n.a.   | BMB* |
| 2      | 34.47           | n.a.      | 12.852        | 13.920          | 2.85          | n.a.   | BM*  |
| 3      | 36.53           | n.a.      | 71.806        | 86.050          | 17.60         | n.a.   | MB*  |
| 4      | 49.81           | n.a.      | 11.100        | 17.195          | 3.52          | n.a.   | BMB* |
| Total: |                 |           | 480.457       | 488.950         | 100.00        | 0.000  |      |



### 340 GWM-GE-091-1-RAC-ADH-85/15-1.0-230

Sample Name: GWM-GE-091-1-RAC-ADH-85/15-1.0-230 Injection Volume: 20.0  
 Vial Number: 438 Channel: UV\_VIS\_1  
 Sample Type: standard Wavelength: 230  
 Control Program: Gao Weiming Bandwidth: n.a.  
 Quantif. Method: Gao Weiming Dilution Factor: 1.0000  
 Recording Time: 2014-1-16 21:00 Sample Weight: 1.0000  
 Run Time (min): 25.38 Sample Amount: 1.0000

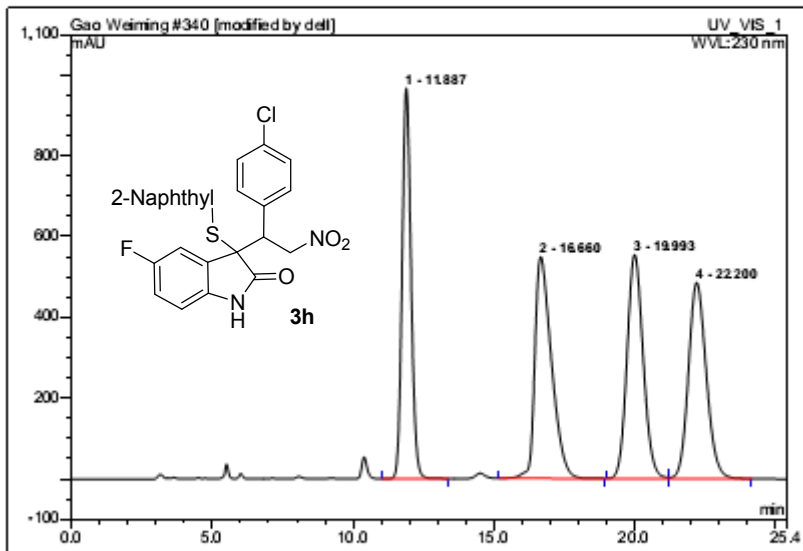

| No.    | Ret.Time min | Peak Name | Height mAU | Area mAU*min | Rel.Area % | Amount | Type |
|--------|--------------|-----------|------------|--------------|------------|--------|------|
| 1      | 11.89        | n.a.      | 967.602    | 354.843      | 24.34      | n.a.   | BMB* |
| 2      | 16.66        | n.a.      | 548.515    | 375.199      | 25.74      | n.a.   | BMB* |
| 3      | 19.99        | n.a.      | 554.651    | 369.871      | 25.37      | n.a.   | BM * |
| 4      | 22.20        | n.a.      | 485.799    | 357.892      | 24.55      | n.a.   | MB*  |
| Total: |              |           | 2556.567   | 1457.805     | 100.00     | 0.000  |      |

### 339 GWM-GE-091-1-ASY-ADH-85/15-1.0-230

Sample Name: GWM-GE-091-1-ASY-ADH-85/15-1.0-230 Injection Volume: 20.0  
 Vial Number: 437 Channel: UV\_VIS\_1  
 Sample Type: standard Wavelength: 230  
 Control Program: Gao Weiming Bandwidth: n.a.  
 Quantif. Method: Gao Weiming Dilution Factor: 1.0000  
 Recording Time: 2014-1-16 20:29 Sample Weight: 1.0000  
 Run Time (min): 25.87 Sample Amount: 1.0000

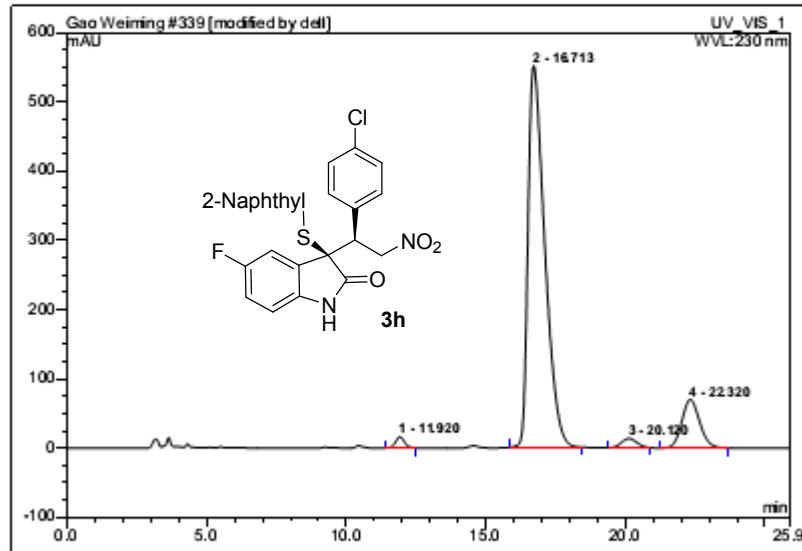

| No.    | Ret.Time min | Peak Name | Height mAU | Area mAU*min | Rel.Area % | Amount | Type |
|--------|--------------|-----------|------------|--------------|------------|--------|------|
| 1      | 11.92        | n.a.      | 15.817     | 5.866        | 1.31       | n.a.   | BMB* |
| 2      | 16.71        | n.a.      | 551.421    | 382.420      | 85.21      | n.a.   | BMB* |
| 3      | 20.12        | n.a.      | 13.317     | 8.576        | 1.91       | n.a.   | BMB* |
| 4      | 22.32        | n.a.      | 70.089     | 51.942       | 11.57      | n.a.   | BMB* |
| Total: |              |           | 650.644    | 448.805      | 100.00     | 0.000  |      |

### 349 GWM-GE-091-2-RAC-ADH-85/15-1.0-230

Sample Name: GWM-GE-091-2-RAC-ADH-85/15-1.0-230 Injection Volume: 20.0  
 Vial Number: 447 Channel: UV\_VIS\_1  
 Sample Type: standard Wavelength: 230  
 Control Program: Gao Weiming Bandwidth: n.a.  
 Quantif. Method: Gao Weiming Dilution Factor: 1.0000  
 Recording Time: 2014-1-18 11:16 Sample Weight: 1.0000  
 Run Time (min): 27.69 Sample Amount: 1.0000

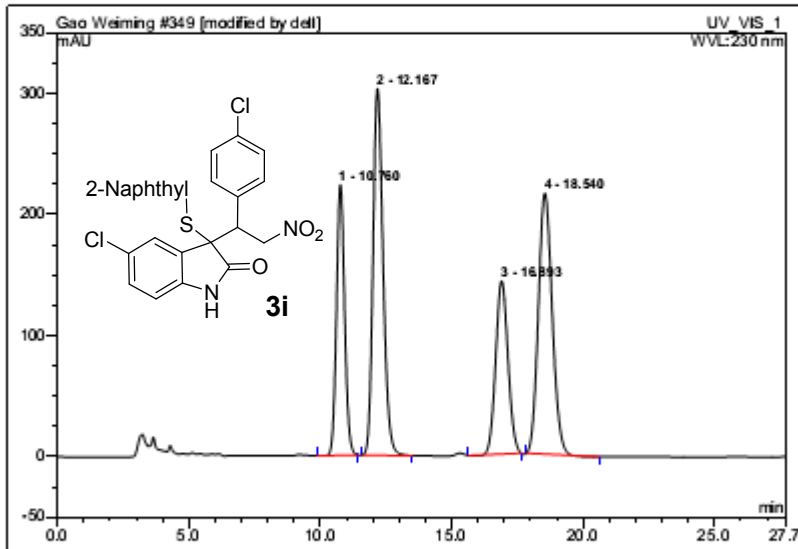

| No.           | Ret.Time min | Peak Name | Height mAU | Area mAU*min | Rel.Area % | Amount | Type |
|---------------|--------------|-----------|------------|--------------|------------|--------|------|
| 1             | 10.76        | n.a.      | 223.178    | 79.736       | 18.89      | n.a.   | BMB* |
| 2             | 12.17        | n.a.      | 302.623    | 133.871      | 31.72      | n.a.   | BMB* |
| 3             | 16.89        | n.a.      | 142.977    | 77.319       | 18.32      | n.a.   | BMB* |
| 4             | 18.54        | n.a.      | 215.461    | 131.128      | 31.07      | n.a.   | BMB* |
| <b>Total:</b> |              |           | 884.239    | 422.054      | 100.00     | 0.000  |      |

### 347 GWM-GE-091-2-ASY-ADH-85/15-1.0-230

Sample Name: GWM-GE-091-2-ASY-ADH-85/15-1.0-230 Injection Volume: 20.0  
 Vial Number: 445 Channel: UV\_VIS\_1  
 Sample Type: standard Wavelength: 230  
 Control Program: Gao Weiming Bandwidth: n.a.  
 Quantif. Method: Gao Weiming Dilution Factor: 1.0000  
 Recording Time: 2014-1-18 10:10 Sample Weight: 1.0000  
 Run Time (min): 26.43 Sample Amount: 1.0000

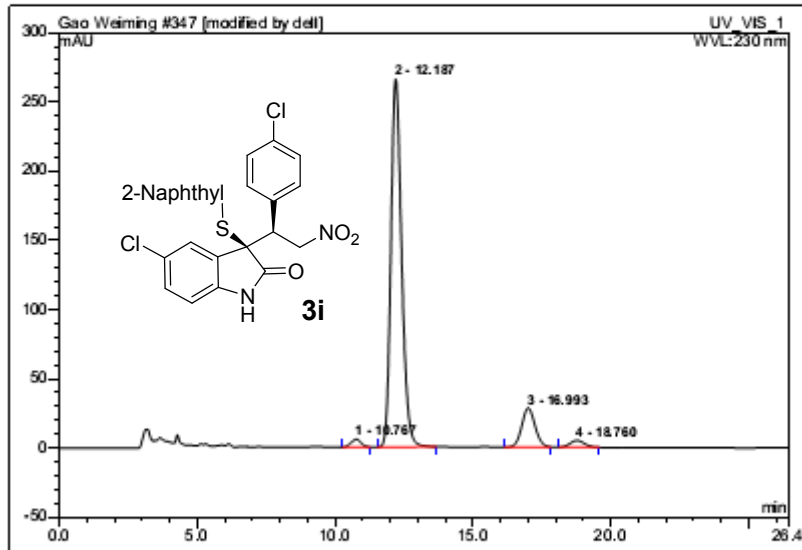

| No.           | Ret.Time min | Peak Name | Height mAU | Area mAU*min | Rel.Area % | Amount | Type |
|---------------|--------------|-----------|------------|--------------|------------|--------|------|
| 1             | 10.77        | n.a.      | 5.738      | 2.372        | 1.69       | n.a.   | BMB* |
| 2             | 12.19        | n.a.      | 265.792    | 119.269      | 84.98      | n.a.   | BMB* |
| 3             | 16.99        | n.a.      | 28.092     | 15.713       | 11.20      | n.a.   | BMB* |
| 4             | 18.76        | n.a.      | 4.909      | 2.990        | 2.13       | n.a.   | BMB* |
| <b>Total:</b> |              |           | 304.532    | 140.344      | 100.00     | 0.000  |      |

### 343 GWM-GE-091-3-RAC-ADH-85/15-1.0-230

**Sample Name:** GWM-GE-091-3-RAC-ADH-85/15-1.0-230    **Injection Volume:** 20.0  
**Vial Number:** 441    **Channel:** UV\_VIS\_1  
**Sample Type:** standard    **Wavelength:** 230  
**Control Program:** Gao Weiming    **Bandwidth:** n.a.  
**Quantif. Method:** Gao Weiming    **Dilution Factor:** 1.0000  
**Recording Time:** 2014-1-16 23:08    **Sample Weight:** 1.0000  
**Run Time (min):** 21.61    **Sample Amount:** 1.0000

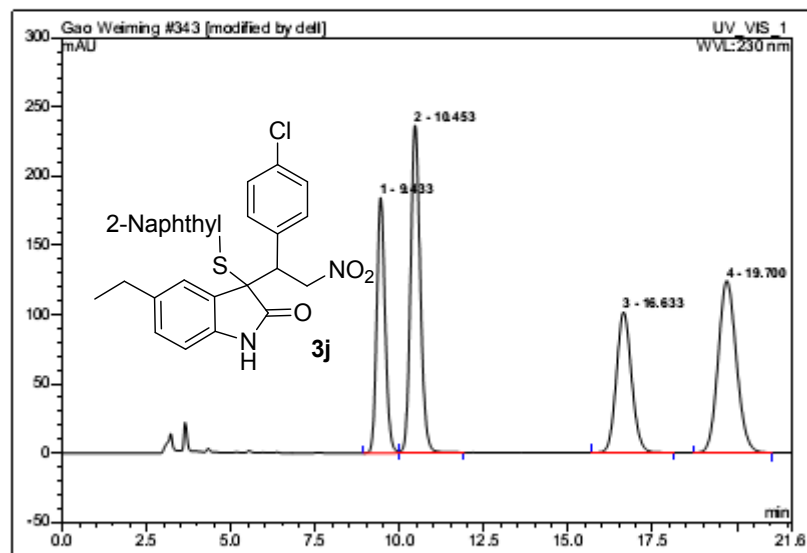

| No.           | Ret.Time<br>min | Peak Name | Height<br>mAU | Area<br>mAU*min | Rel.Area<br>% | Amount | Type |
|---------------|-----------------|-----------|---------------|-----------------|---------------|--------|------|
| 1             | 9.43            | n.a.      | 184.359       | 53.235          | 20.20         | n.a.   | BM   |
| 2             | 10.45           | n.a.      | 236.461       | 78.803          | 29.90         | n.a.   | MB   |
| 3             | 16.63           | n.a.      | 101.383       | 53.293          | 20.22         | n.a.   | BMB  |
| 4             | 19.70           | n.a.      | 124.151       | 78.198          | 29.67         | n.a.   | BMB  |
| <b>Total:</b> |                 |           | 646.354       | 263.529         | 100.00        | 0.000  |      |

### 341 GWM-GE-091-3-ASY-ADH-85/15-1.0-230

**Sample Name:** GWM-GE-091-3-ASY-ADH-85/15-1.0-230    **Injection Volume:** 20.0  
**Vial Number:** 439    **Channel:** UV\_VIS\_1  
**Sample Type:** standard    **Wavelength:** 230  
**Control Program:** Gao Weiming    **Bandwidth:** n.a.  
**Quantif. Method:** Gao Weiming    **Dilution Factor:** 1.0000  
**Recording Time:** 2014-1-16 21:32    **Sample Weight:** 1.0000  
**Run Time (min):** 21.62    **Sample Amount:** 1.0000

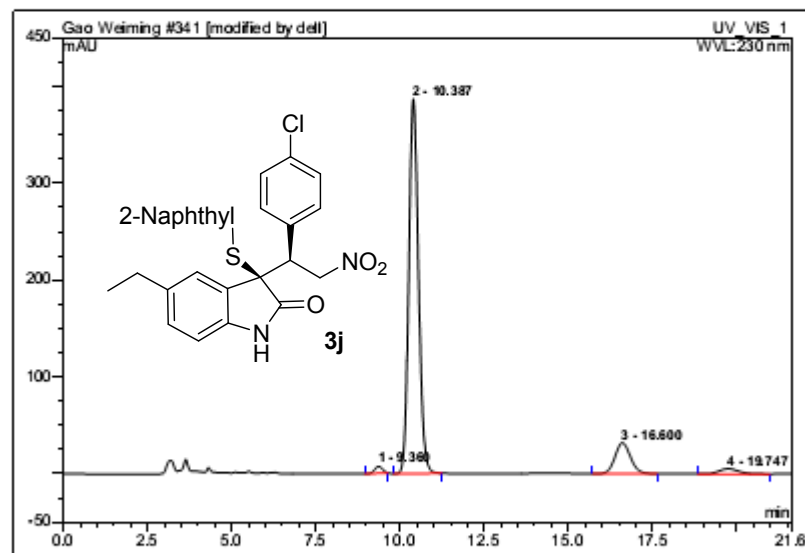

| No.           | Ret.Time<br>min | Peak Name | Height<br>mAU | Area<br>mAU*min | Rel.Area<br>% | Amount | Type |
|---------------|-----------------|-----------|---------------|-----------------|---------------|--------|------|
| 1             | 9.36            | n.a.      | 7.080         | 1.920           | 1.27          | n.a.   | BMB* |
| 2             | 10.39           | n.a.      | 386.343       | 128.538         | 85.10         | n.a.   | BMB* |
| 3             | 16.60           | n.a.      | 31.762        | 16.925          | 11.21         | n.a.   | BMB* |
| 4             | 19.75           | n.a.      | 5.431         | 3.667           | 2.43          | n.a.   | BMB* |
| <b>Total:</b> |                 |           | 430.615       | 151.050         | 100.00        | 0.000  |      |

### 410 GWM-GE-125-RAC-ADH-85/15-1.0-230

Sample Name: GWM-GE-125-RAC-ADH-85/15-1.0-230 Injection Volume: 20.0  
 Vial Number: 508 Channel: UV\_VIS\_1  
 Sample Type: standard Wavelength: 230  
 Control Program: Gao Weiming Bandwidth: n.a.  
 Quantif. Method: Gao Weiming Dilution Factor: 1.0000  
 Recording Time: 2014-2-27 21:14 Sample Weight: 1.0000  
 Run Time (min): 32.34 Sample Amount: 1.0000

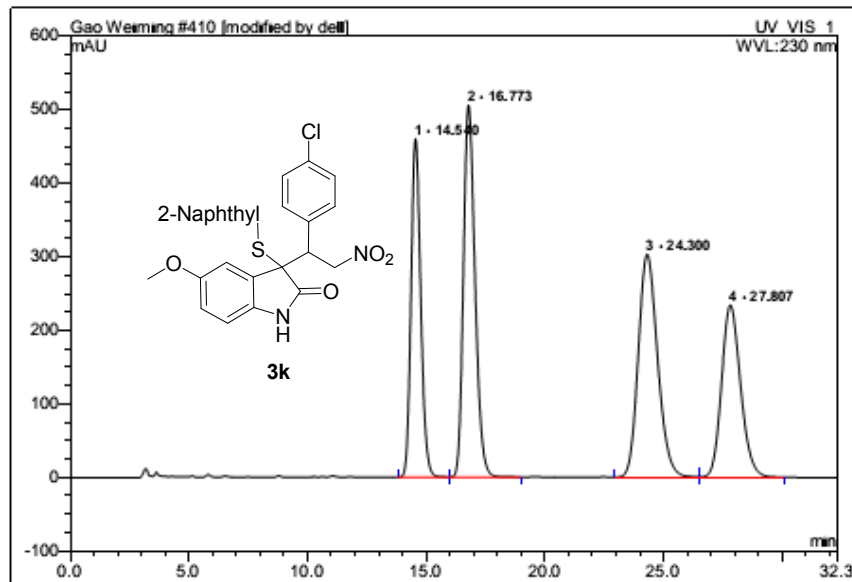

| No.           | Ret.Time min | Peak Name | Height mAU | Area mAU*min | Rel.Area % | Amount | Type |
|---------------|--------------|-----------|------------|--------------|------------|--------|------|
| 1             | 14.54        | n.a.      | 460.878    | 217.481      | 21.59      | n.a.   | BM   |
| 2             | 16.77        | n.a.      | 506.371    | 286.299      | 28.43      | n.a.   | MB   |
| 3             | 24.30        | n.a.      | 303.356    | 285.952      | 28.39      | n.a.   | BM   |
| 4             | 27.81        | n.a.      | 234.109    | 217.466      | 21.59      | n.a.   | MB   |
| <b>Total:</b> |              |           | 1504.714   | 1007.197     | 100.00     | 0.000  |      |

### 409 GWM-GE-125-ASY-ADH-85/15-1.0-230

Sample Name: GWM-GE-125-ASY-ADH-85/15-1.0-230 Injection Volume: 20.0  
 Vial Number: 507 Channel: UV\_VIS\_1  
 Sample Type: standard Wavelength: 230  
 Control Program: Gao Weiming Bandwidth: n.a.  
 Quantif. Method: Gao Weiming Dilution Factor: 1.0000  
 Recording Time: 2014-2-27 20:38 Sample Weight: 1.0000  
 Run Time (min): 32.57 Sample Amount: 1.0000

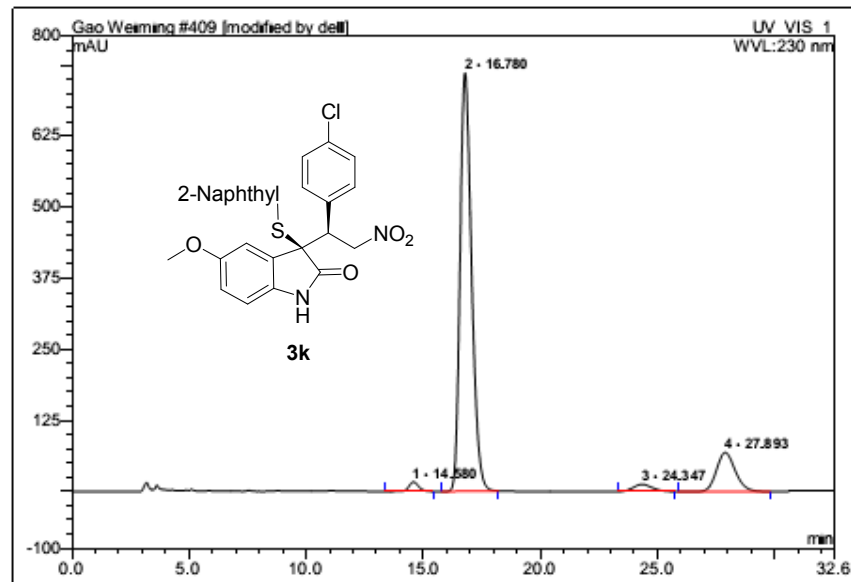

| No.           | Ret.Time min | Peak Name | Height mAU | Area mAU*min | Rel.Area % | Amount | Type |
|---------------|--------------|-----------|------------|--------------|------------|--------|------|
| 1             | 14.58        | n.a.      | 16.549     | 7.890        | 1.57       | n.a.   | BMB* |
| 2             | 16.78        | n.a.      | 735.860    | 419.056      | 83.41      | n.a.   | BMB* |
| 3             | 24.35        | n.a.      | 12.607     | 11.707       | 2.33       | n.a.   | BMB* |
| 4             | 27.89        | n.a.      | 68.489     | 63.757       | 12.69      | n.a.   | BMB* |
| <b>Total:</b> |              |           | 833.506    | 502.411      | 100.00     | 0.000  |      |

### 364 GWM-GE-095-RAC-IC-95/5-1.0-230

Sample Name: GWM-GE-095-RAC-IC-95/5-1.0-230 Injection Volume: 20.0  
 Vial Number: 462 Channel: UV\_VIS\_1  
 Sample Type: standard Wavelength: 230  
 Control Program: Gao Weiming Bandwidth: n.a.  
 Quantif. Method: Gao Weiming Dilution Factor: 1.0000  
 Recording Time: 2014-1-20 23:21 Sample Weight: 1.0000  
 Run Time (min): 24.89 Sample Amount: 1.0000

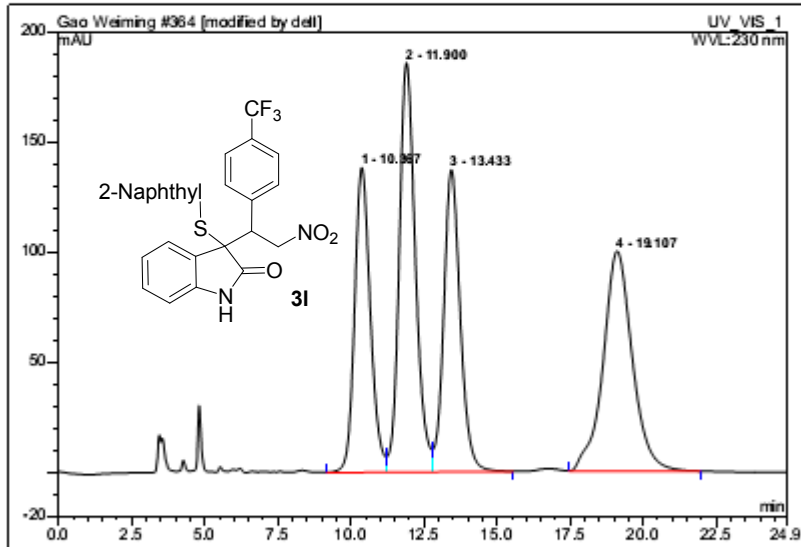

| No.    | Ret.Time min | Peak Name | Height mAU | Area mAU*min | Rel.Area % | Amount | Type |
|--------|--------------|-----------|------------|--------------|------------|--------|------|
| 1      | 10.37        | n.a.      | 138.287    | 86.551       | 21.04      | n.a.   | BM   |
| 2      | 11.90        | n.a.      | 185.839    | 118.984      | 28.93      | n.a.   | M    |
| 3      | 13.43        | n.a.      | 137.153    | 89.954       | 21.87      | n.a.   | MB   |
| 4      | 19.11        | n.a.      | 99.807     | 115.786      | 28.15      | n.a.   | BMB  |
| Total: |              |           | 561.086    | 411.275      | 100.00     | 0.000  |      |

### 363 GWM-GE-095-ASY-IC-95/5-1.0-230

Sample Name: GWM-GE-095-ASY-IC-95/5-1.0-230 Injection Volume: 20.0  
 Vial Number: 461 Channel: UV\_VIS\_1  
 Sample Type: standard Wavelength: 230  
 Control Program: Gao Weiming Bandwidth: n.a.  
 Quantif. Method: Gao Weiming Dilution Factor: 1.0000  
 Recording Time: 2014-1-20 22:55 Sample Weight: 1.0000  
 Run Time (min): 22.48 Sample Amount: 1.0000

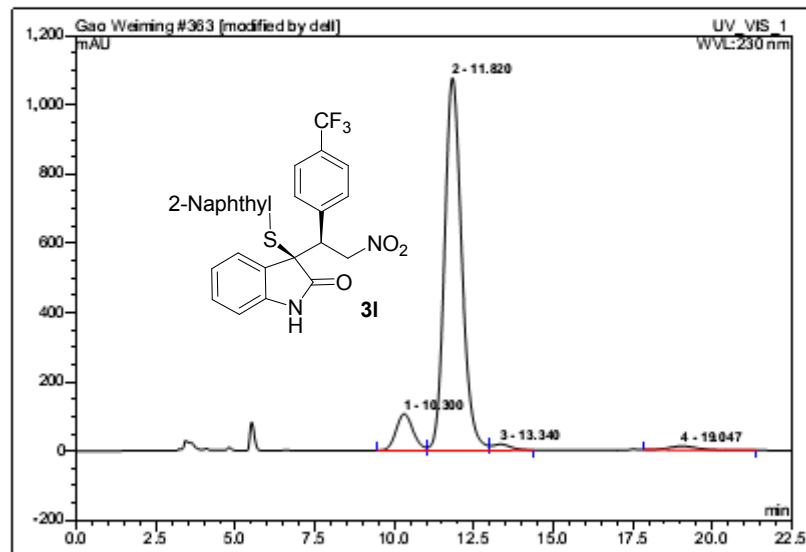

| No.    | Ret.Time min | Peak Name | Height mAU | Area mAU*min | Rel.Area % | Amount | Type |
|--------|--------------|-----------|------------|--------------|------------|--------|------|
| 1      | 10.30        | n.a.      | 105.910    | 66.020       | 8.63       | n.a.   | BM*  |
| 2      | 11.82        | n.a.      | 1076.603   | 674.894      | 88.23      | n.a.   | M*   |
| 3      | 13.34        | n.a.      | 17.520     | 12.205       | 1.60       | n.a.   | MB*  |
| 4      | 19.05        | n.a.      | 11.261     | 11.825       | 1.55       | n.a.   | BMB  |
| Total: |              |           | 1211.295   | 764.944      | 100.00     | 0.000  |      |

### 417 GWM-GE-115-1-RAC-OZH-95/5-1.0-230

Sample Name: GWM-GE-115-1-RAC-OZH-95/5-1.0-230 Injection Volume: 20.0  
 Vial Number: 515 Channel: UV\_VIS\_1  
 Sample Type: standard Wavelength: 230  
 Control Program: Gao Weiming Bandwidth: n.a.  
 Quantif. Method: Gao Weiming Dilution Factor: 1.0000  
 Recording Time: 2014-2-28 10:45 Sample Weight: 1.0000  
 Run Time (min): 26.18 Sample Amount: 1.0000

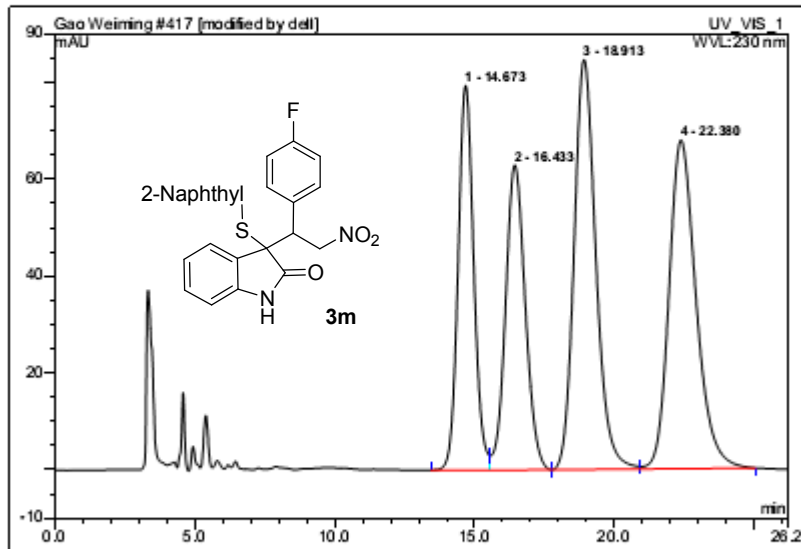

| No.           | Ret.Time min | Peak Name | Height mAU | Area mAU*min | Rel.Area % | Amount | Type |
|---------------|--------------|-----------|------------|--------------|------------|--------|------|
| 1             | 14.67        | n.a.      | 79.389     | 51.528       | 20.20      | n.a.   | BM   |
| 2             | 16.43        | n.a.      | 62.921     | 51.395       | 20.15      | n.a.   | MB   |
| 3             | 18.91        | n.a.      | 84.588     | 76.293       | 29.91      | n.a.   | BM   |
| 4             | 22.38        | n.a.      | 67.798     | 75.897       | 29.75      | n.a.   | MB   |
| <b>Total:</b> |              |           | 294.696    | 255.113      | 100.00     | 0.000  |      |

### 416 GWM-GE-115-1-ASY-OZH-95/5-1.0-230

Sample Name: GWM-GE-115-1-ASY-OZH-95/5-1.0-230 Injection Volume: 20.0  
 Vial Number: 514 Channel: UV\_VIS\_1  
 Sample Type: standard Wavelength: 230  
 Control Program: Gao Weiming Bandwidth: n.a.  
 Quantif. Method: Gao Weiming Dilution Factor: 1.0000  
 Recording Time: 2014-2-28 10:16 Sample Weight: 1.0000  
 Run Time (min): 26.64 Sample Amount: 1.0000

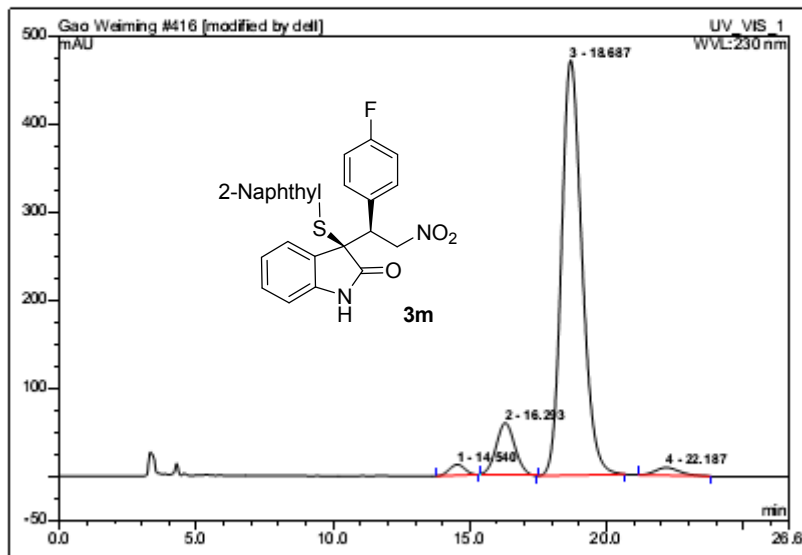

| No.           | Ret.Time min | Peak Name | Height mAU | Area mAU*min | Rel.Area % | Amount | Type |
|---------------|--------------|-----------|------------|--------------|------------|--------|------|
| 1             | 14.54        | n.a.      | 12.148     | 7.906        | 1.67       | n.a.   | BMB* |
| 2             | 16.29        | n.a.      | 60.018     | 49.050       | 10.33      | n.a.   | MB*  |
| 3             | 18.69        | n.a.      | 471.041    | 408.897      | 86.15      | n.a.   | BMB* |
| 4             | 22.19        | n.a.      | 8.743      | 8.803        | 1.85       | n.a.   | BMB* |
| <b>Total:</b> |              |           | 551.951    | 474.655      | 100.00     | 0.000  |      |

### 402 GWM-GE-115-3-RAC-ADH-85/15-1.0-230

**Sample Name:** GWM-GE-115-3-RAC-ADH-85/15-1.0-230    **Injection Volume:** 20.0  
**Vial Number:** 500    **Channel:** UV\_VIS\_1  
**Sample Type:** standard    **Wavelength:** 230  
**Control Program:** Gao Weiming    **Bandwidth:** n.a.  
**Quantif. Method:** Gao Weiming    **Dilution Factor:** 1.0000  
**Recording Time:** 2014-2-27 16:01    **Sample Weight:** 1.0000  
**Run Time (min):** 32.68    **Sample Amount:** 1.0000

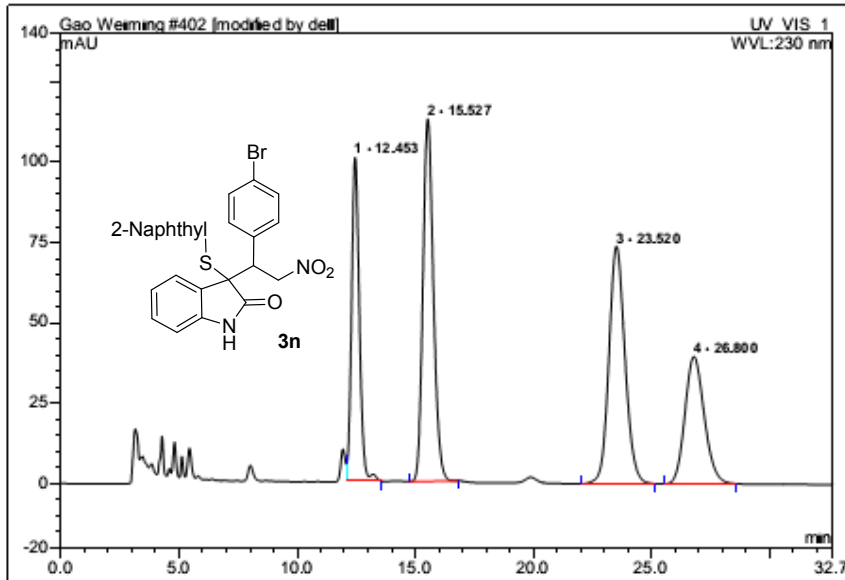

| No.           | Ret.Time min | Peak Name | Height mAU | Area mAU*min | Rel.Area % | Amount | Type |
|---------------|--------------|-----------|------------|--------------|------------|--------|------|
| 1             | 12.45        | n.a.      | 100.869    | 38.390       | 19.94      | n.a.   | MB*  |
| 2             | 15.53        | n.a.      | 112.956    | 57.920       | 30.08      | n.a.   | BMB* |
| 3             | 23.52        | n.a.      | 74.001     | 58.529       | 30.39      | n.a.   | BMB  |
| 4             | 26.80        | n.a.      | 39.673     | 37.727       | 19.59      | n.a.   | BMB  |
| <b>Total:</b> |              |           | 327.499    | 192.565      | 100.00     | 0.000  |      |

### 401 GWM-GE-115-3-ASY-ADH-85/15-1.0-230

**Sample Name:** GWM-GE-115-3-ASY-ADH-85/15-1.0-230    **Injection Volume:** 20.0  
**Vial Number:** 499    **Channel:** UV\_VIS\_1  
**Sample Type:** standard    **Wavelength:** 230  
**Control Program:** Gao Weiming    **Bandwidth:** n.a.  
**Quantif. Method:** Gao Weiming    **Dilution Factor:** 1.0000  
**Recording Time:** 2014-2-27 15:26    **Sample Weight:** 1.0000  
**Run Time (min):** 30.54    **Sample Amount:** 1.0000

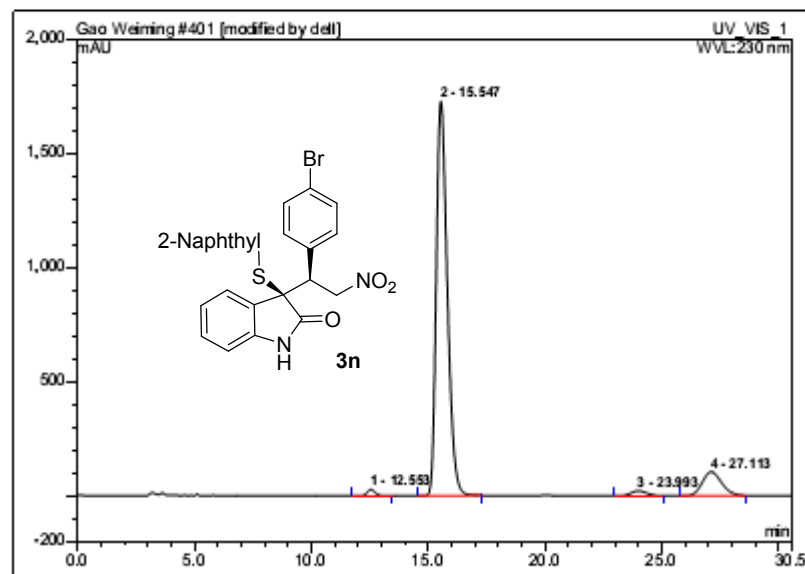

| No.           | Ret.Time min | Peak Name | Height mAU | Area mAU*min | Rel.Area % | Amount | Type |
|---------------|--------------|-----------|------------|--------------|------------|--------|------|
| 1             | 12.55        | n.a.      | 27.294     | 10.785       | 1.01       | n.a.   | BMB* |
| 2             | 15.55        | n.a.      | 1727.548   | 943.756      | 87.95      | n.a.   | BMB* |
| 3             | 23.99        | n.a.      | 21.851     | 17.304       | 1.61       | n.a.   | BMB* |
| 4             | 27.11        | n.a.      | 104.729    | 101.231      | 9.43       | n.a.   | BMB* |
| <b>Total:</b> |              |           | 1881.422   | 1073.076     | 100.00     | 0.000  |      |

### 421 GWM-GE-115-4-RAC-OZH-90/10-1.0-230

Sample Name: GWM-GE-115-4-RAC-OZH-90/10-1.0-230 Injection Volume: 20.0  
 Vial Number: 519 Channel: UV\_VIS\_1  
 Sample Type: standard Wavelength: 230  
 Control Program: Gao Weiming Bandwidth: n.a.  
 Quantif. Method: Gao Weiming Dilution Factor: 1.0000  
 Recording Time: 2014-2-28 13:33 Sample Weight: 1.0000  
 Run Time (min): 16.61 Sample Amount: 1.0000

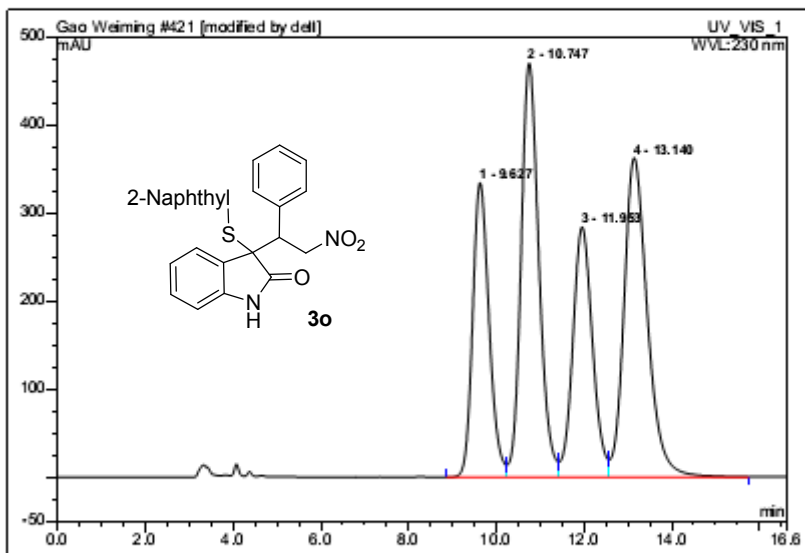

| No.    | Ret.Time min | Peak Name | Height mAU | Area mAU*min | Rel.Area % | Amount | Type |
|--------|--------------|-----------|------------|--------------|------------|--------|------|
| 1      | 9.63         | n.a.      | 334.144    | 144.622      | 19.65      | n.a.   | BM   |
| 2      | 10.75        | n.a.      | 470.022    | 220.324      | 29.94      | n.a.   | M    |
| 3      | 11.95        | n.a.      | 283.823    | 147.191      | 20.00      | n.a.   | M    |
| 4      | 13.14        | n.a.      | 362.245    | 223.700      | 30.40      | n.a.   | MB   |
| Total: |              |           | 1450.234   | 735.838      | 100.00     | 0.000  |      |

### 420 GWM-GE-115-4-ASY-OZH-90/10-1.0-230

Sample Name: GWM-GE-115-4-ASY-OZH-90/10-1.0-230 Injection Volume: 20.0  
 Vial Number: 518 Channel: UV\_VIS\_1  
 Sample Type: standard Wavelength: 230  
 Control Program: Gao Weiming Bandwidth: n.a.  
 Quantif. Method: Gao Weiming Dilution Factor: 1.0000  
 Recording Time: 2014-2-28 13:13 Sample Weight: 1.0000  
 Run Time (min): 16.79 Sample Amount: 1.0000

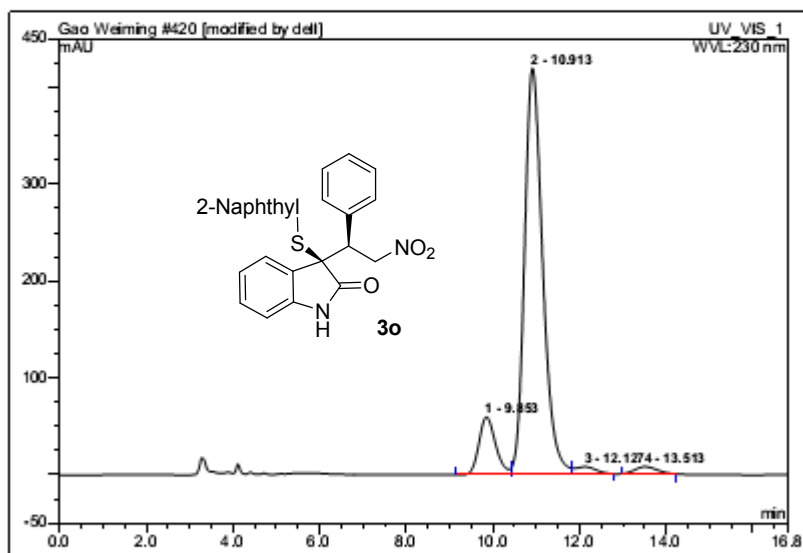

| No.    | Ret.Time min | Peak Name | Height mAU | Area mAU*min | Rel.Area % | Amount | Type |
|--------|--------------|-----------|------------|--------------|------------|--------|------|
| 1      | 9.85         | n.a.      | 59.838     | 26.851       | 11.29      | n.a.   | BM*  |
| 2      | 10.91        | n.a.      | 418.675    | 202.719      | 85.20      | n.a.   | M*   |
| 3      | 12.13        | n.a.      | 7.255      | 3.978        | 1.67       | n.a.   | MB*  |
| 4      | 13.51        | n.a.      | 7.417      | 4.374        | 1.84       | n.a.   | BMB* |
| Total: |              |           | 493.185    | 237.921      | 100.00     | 0.000  |      |



### 424 GWM-GE-115-5-RAC-OZH-95/5-1.0-230

**Sample Name:** GWM-GE-115-5-RAC-OZH-95/5-1.0-230    **Injection Volume:** 20.0  
**Vial Number:** 522    **Channel:** UV\_VIS\_1  
**Sample Type:** standard    **Wavelength:** 230  
**Control Program:** Gao Weiming    **Bandwidth:** n.a.  
**Quantif. Method:** Gao Weiming    **Dilution Factor:** 1.0000  
**Recording Time:** 2014-2-28 15:53    **Sample Weight:** 1.0000  
**Run Time (min):** 27.09    **Sample Amount:** 1.0000

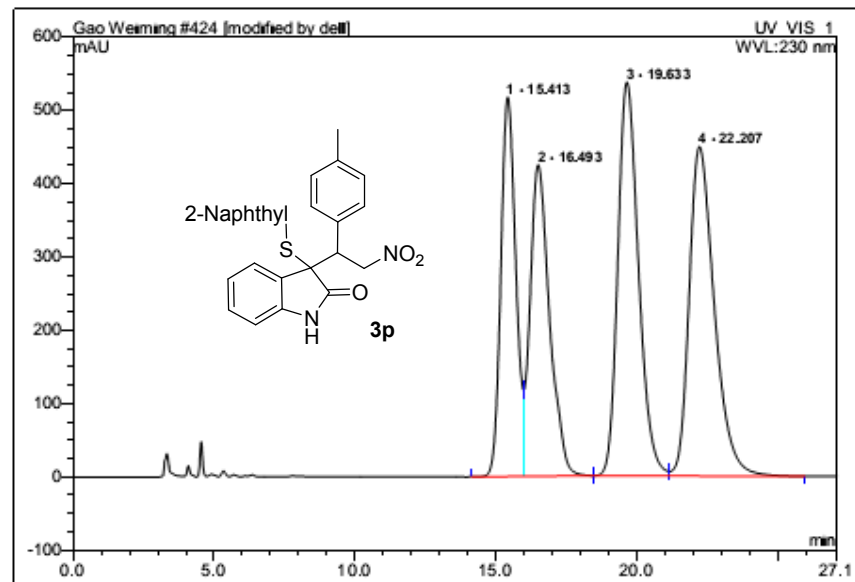

| No.           | Ret.Time min | Peak Name | Height mAU | Area mAU*min | Rel.Area % | Amount | Type |
|---------------|--------------|-----------|------------|--------------|------------|--------|------|
| 1             | 15.41        | n.a.      | 518.025    | 316.541      | 20.03      | n.a.   | BM   |
| 2             | 16.49        | n.a.      | 425.126    | 341.825      | 21.63      | n.a.   | Mb   |
| 3             | 19.63        | n.a.      | 537.500    | 456.535      | 28.89      | n.a.   | bM   |
| 4             | 22.21        | n.a.      | 449.877    | 465.536      | 29.46      | n.a.   | MB   |
| <b>Total:</b> |              |           | 1930.528   | 1580.438     | 100.00     | 0.000  |      |

### 423 GWM-GE-115-5-ASY-OZH-95/5-1.0-230

**Sample Name:** GWM-GE-115-5-ASY-OZH-95/5-1.0-230    **Injection Volume:** 20.0  
**Vial Number:** 521    **Channel:** UV\_VIS\_1  
**Sample Type:** standard    **Wavelength:** 230  
**Control Program:** Gao Weiming    **Bandwidth:** n.a.  
**Quantif. Method:** Gao Weiming    **Dilution Factor:** 1.0000  
**Recording Time:** 2014-2-28 15:21    **Sample Weight:** 1.0000  
**Run Time (min):** 27.56    **Sample Amount:** 1.0000

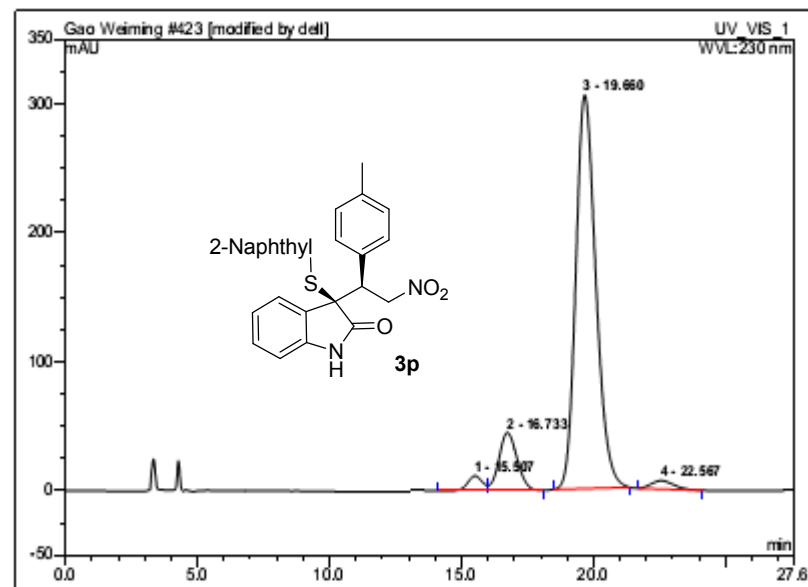

| No.           | Ret.Time min | Peak Name | Height mAU | Area mAU*min | Rel.Area % | Amount | Type |
|---------------|--------------|-----------|------------|--------------|------------|--------|------|
| 1             | 15.51        | n.a.      | 11.539     | 7.601        | 2.40       | n.a.   | BM*  |
| 2             | 16.73        | n.a.      | 44.740     | 35.443       | 11.17      | n.a.   | MB*  |
| 3             | 19.66        | n.a.      | 305.125    | 267.928      | 84.45      | n.a.   | BMB* |
| 4             | 22.57        | n.a.      | 6.428      | 6.293        | 1.98       | n.a.   | BMB* |
| <b>Total:</b> |              |           | 367.832    | 317.265      | 100.00     | 0.000  |      |

### 415 GWM-GE-115-6-RAC-OZH-95/5-1.0-230

Sample Name: GWM-GE-115-6-RAC-OZH-95/5-1.0-230 Injection Volume: 20.0  
 Vial Number: 513 Channel: UV\_VIS\_1  
 Sample Type: standard Wavelength: 230  
 Control Program: Gao Weiming Bandwidth: n.a.  
 Quantif. Method: Gao Weiming Dilution Factor: 1.0000  
 Recording Time: 2014-2-28 9:29 Sample Weight: 1.0000  
 Run Time (min): 42.43 Sample Amount: 1.0000

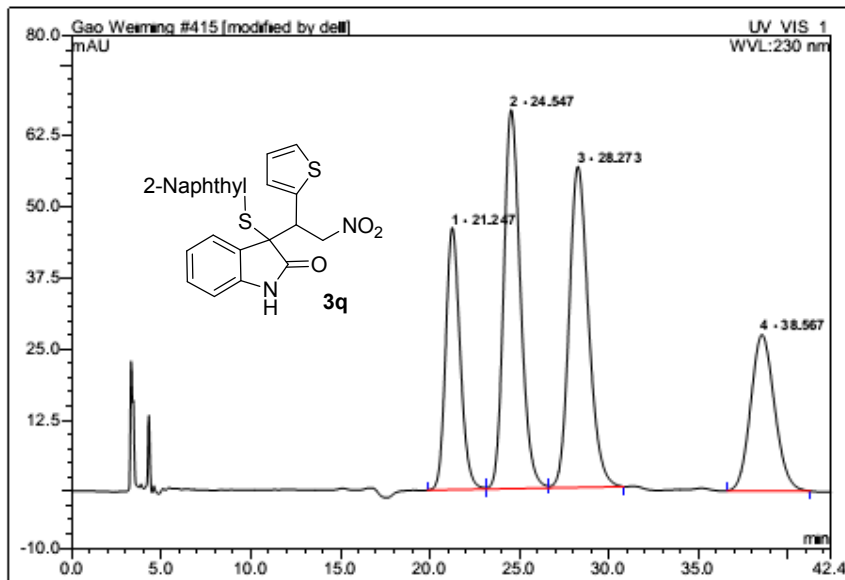

| No.           | Ret.Time min | Peak Name | Height mAU | Area mAU*min | Rel.Area % | Amount | Type |
|---------------|--------------|-----------|------------|--------------|------------|--------|------|
| 1             | 21.25        | n.a.      | 46.119     | 43.163       | 18.86      | n.a.   | BM   |
| 2             | 24.55        | n.a.      | 66.686     | 72.121       | 31.51      | n.a.   | M    |
| 3             | 28.27        | n.a.      | 56.457     | 70.961       | 31.00      | n.a.   | MB   |
| 4             | 38.57        | n.a.      | 27.484     | 42.627       | 18.62      | n.a.   | BMB  |
| <b>Total:</b> |              |           | 196.744    | 228.873      | 100.00     | 0.000  |      |

### 414 GWM-GE-115-6-ASY-OZH-95/5-1.0-230

Sample Name: GWM-GE-115-6-ASY-OZH-95/5-1.0-230 Injection Volume: 20.0  
 Vial Number: 512 Channel: UV\_VIS\_1  
 Sample Type: standard Wavelength: 230  
 Control Program: Gao Weiming Bandwidth: n.a.  
 Quantif. Method: Gao Weiming Dilution Factor: 1.0000  
 Recording Time: 2014-2-28 8:43 Sample Weight: 1.0000  
 Run Time (min): 42.84 Sample Amount: 1.0000

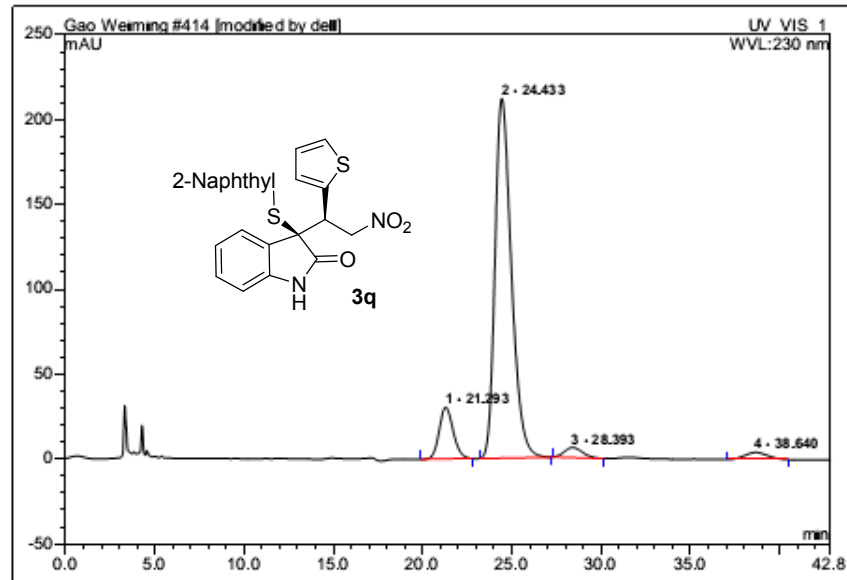

| No.           | Ret.Time min | Peak Name | Height mAU | Area mAU*min | Rel.Area % | Amount | Type |
|---------------|--------------|-----------|------------|--------------|------------|--------|------|
| 1             | 21.29        | n.a.      | 30.376     | 27.633       | 10.37      | n.a.   | BMB* |
| 2             | 24.43        | n.a.      | 212.046    | 225.745      | 84.72      | n.a.   | BMB* |
| 3             | 28.39        | n.a.      | 5.942      | 6.969        | 2.62       | n.a.   | BMB* |
| 4             | 38.64        | n.a.      | 4.106      | 6.109        | 2.29       | n.a.   | BMB* |
| <b>Total:</b> |              |           | 252.469    | 266.455      | 100.00     | 0.000  |      |

### 469 GWM-GE-139-RAC-IF-90/10-1.0-230

Sample Name: GWM-GE-139-RAC-IF-90/10-1.0-230 Injection Volume: 20.0  
 Vial Number: 567 Channel: UV\_VIS\_1  
 Sample Type: standard Wavelength: 230  
 Control Program: Gao Weiming Bandwidth: n.a.  
 Quantif. Method: Gao Weiming Dilution Factor: 1.0000  
 Recording Time: 2014-3-14 19:58 Sample Weight: 1.0000  
 Run Time (min): 20.99 Sample Amount: 1.0000

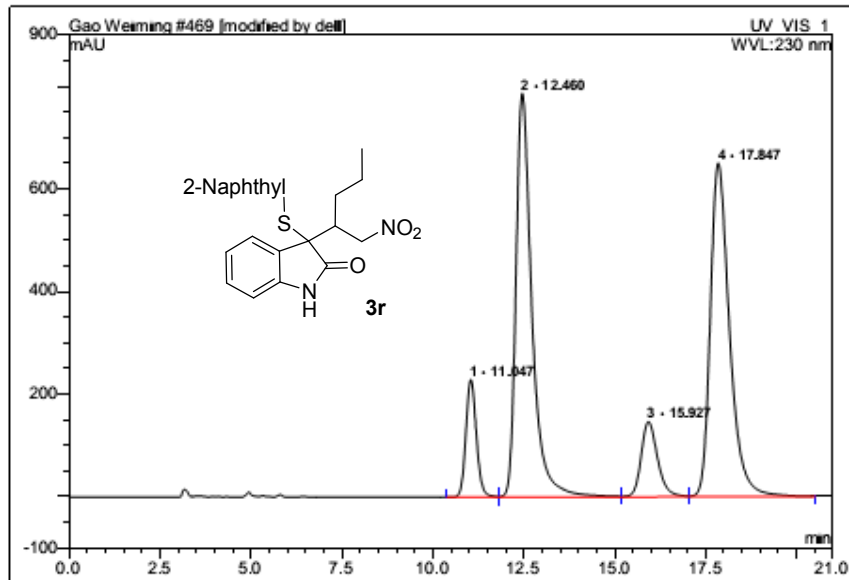

| No.           | Ret.Time min | Peak Name | Height mAU | Area mAU*min | Rel.Area % | Amount | Type |
|---------------|--------------|-----------|------------|--------------|------------|--------|------|
| 1             | 11.05        | n.a.      | 229.331    | 76.864       | 8.08       | n.a.   | BM   |
| 2             | 12.46        | n.a.      | 787.746    | 399.549      | 42.00      | n.a.   | M    |
| 3             | 15.93        | n.a.      | 146.324    | 76.702       | 8.06       | n.a.   | M    |
| 4             | 17.85        | n.a.      | 650.673    | 398.108      | 41.85      | n.a.   | MB   |
| <b>Total:</b> |              |           | 1814.074   | 951.223      | 100.00     | 0.000  |      |

### 468 GWM-GE-139-ASY-IF-90/10-1.0-230

Sample Name: GWM-GE-139-ASY-IF-90/10-1.0-230 Injection Volume: 20.0  
 Vial Number: 566 Channel: UV\_VIS\_1  
 Sample Type: standard Wavelength: 230  
 Control Program: Gao Weiming Bandwidth: n.a.  
 Quantif. Method: Gao Weiming Dilution Factor: 1.0000  
 Recording Time: 2014-3-14 19:33 Sample Weight: 1.0000  
 Run Time (min): 20.59 Sample Amount: 1.0000

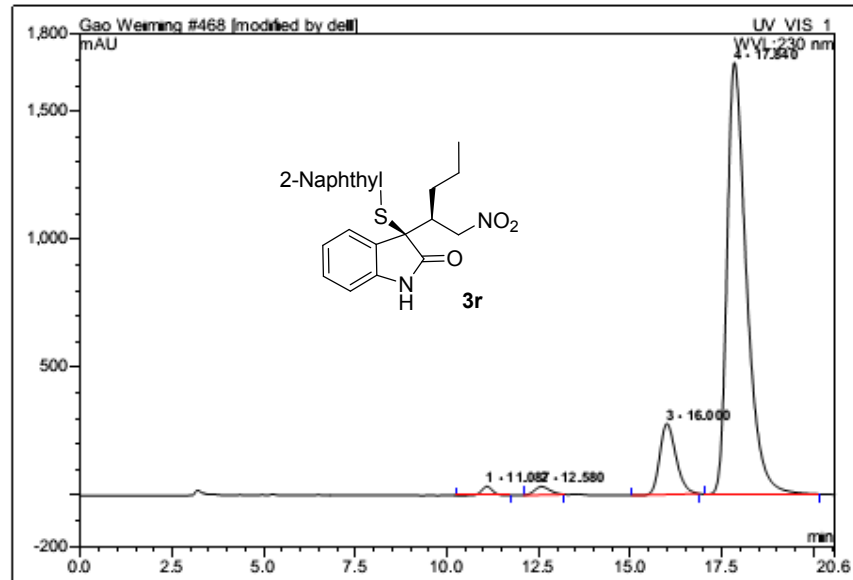

| No.           | Ret.Time min | Peak Name | Height mAU | Area mAU*min | Rel.Area % | Amount | Type |
|---------------|--------------|-----------|------------|--------------|------------|--------|------|
| 1             | 11.09        | n.a.      | 34.484     | 12.098       | 1.00       | n.a.   | BMB* |
| 2             | 12.58        | n.a.      | 32.251     | 15.535       | 1.29       | n.a.   | BMB* |
| 3             | 16.00        | n.a.      | 276.793    | 142.167      | 11.79      | n.a.   | BMB* |
| 4             | 17.84        | n.a.      | 1687.333   | 1036.520     | 85.92      | n.a.   | BMB* |
| <b>Total:</b> |              |           | 2030.862   | 1206.320     | 100.00     | 0.000  |      |

### 477 GWM-GF-013-rac-IF-95/5-1.0-230

Sample Name: GWM-GF-013-rac-IF-95/5-1.0-230 Injection Volume: 20.0  
 Vial Number: 575 Channel: UV\_VIS\_1  
 Sample Type: standard Wavelength: 230  
 Control Program: Gao Weiming Bandwidth: n.a.  
 Quantif. Method: Gao Weiming Dilution Factor: 1.0000  
 Recording Time: 2014-3-18 22:28 Sample Weight: 1.0000  
 Run Time (min): 27.51 Sample Amount: 1.0000

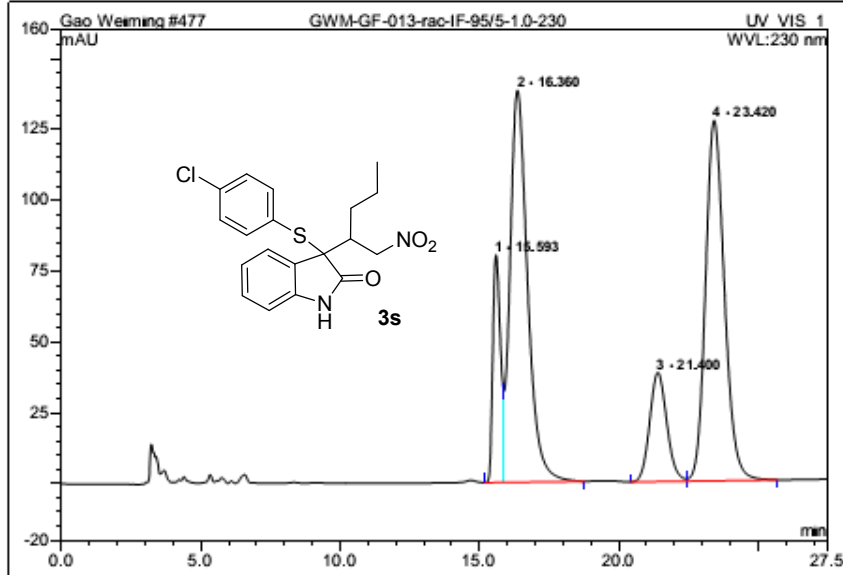

| No.           | Ret.Time min | Peak Name | Height mAU | Area mAU*min | Rel.Area % | Amount | Type |
|---------------|--------------|-----------|------------|--------------|------------|--------|------|
| 1             | 15.59        | n.a.      | 80.352     | 26.449       | 10.38      | n.a.   | BM   |
| 2             | 16.36        | n.a.      | 138.386    | 100.709      | 39.51      | n.a.   | MB   |
| 3             | 21.40        | n.a.      | 38.542     | 27.541       | 10.81      | n.a.   | BM   |
| 4             | 23.42        | n.a.      | 127.265    | 100.185      | 39.31      | n.a.   | MB   |
| <b>Total:</b> |              |           | 384.544    | 254.884      | 100.00     | 0.000  |      |

### 476 GWM-GF-013-asy-IF-95/5-1.0-230

Sample Name: GWM-GF-013-asy-IF-95/5-1.0-230 Injection Volume: 20.0  
 Vial Number: 574 Channel: UV\_VIS\_1  
 Sample Type: standard Wavelength: 230  
 Control Program: Gao Weiming Bandwidth: n.a.  
 Quantif. Method: Gao Weiming Dilution Factor: 1.0000  
 Recording Time: 2014-3-18 21:59 Sample Weight: 1.0000  
 Run Time (min): 27.18 Sample Amount: 1.0000

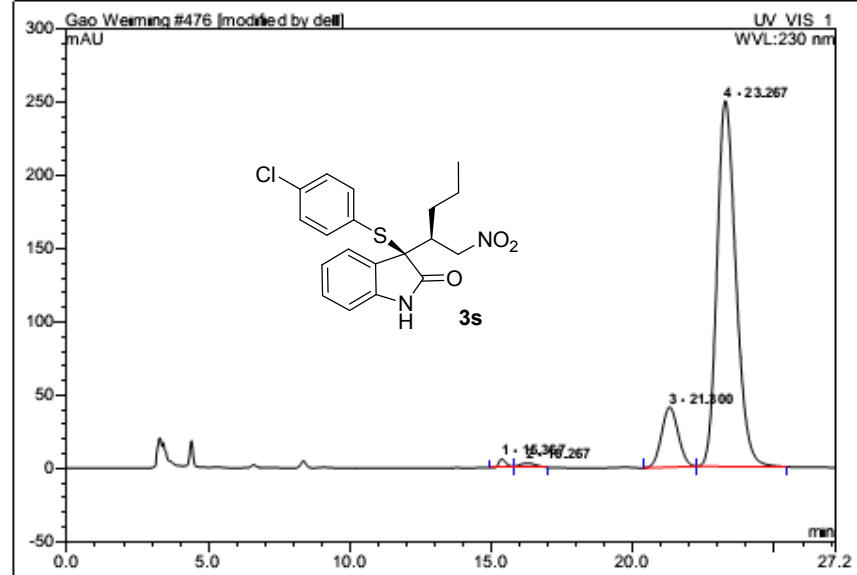

| No.           | Ret.Time min | Peak Name | Height mAU | Area mAU*min | Rel.Area % | Amount | Type |
|---------------|--------------|-----------|------------|--------------|------------|--------|------|
| 1             | 15.37        | n.a.      | 5.838      | 1.859        | 0.82       | n.a.   | BM*  |
| 2             | 16.27        | n.a.      | 2.813      | 1.859        | 0.82       | n.a.   | MB*  |
| 3             | 21.30        | n.a.      | 41.031     | 28.002       | 12.42      | n.a.   | BMB* |
| 4             | 23.27        | n.a.      | 250.182    | 193.820      | 85.94      | n.a.   | bMB* |
| <b>Total:</b> |              |           | 299.865    | 225.540      | 100.00     | 0.000  |      |

### 481 GWM-GF-017-rac-IF-90/10-1.0-230

Sample Name: GWM-GF-017-rac-IF-90/10-1.0-230 Injection Volume: 20.0  
 Vial Number: 579 Channel: UV\_VIS\_1  
 Sample Type: standard Wavelength: 230  
 Control Program: Gao Weiming Bandwidth: n.a.  
 Quantif. Method: Gao Weiming Dilution Factor: 1.0000  
 Recording Time: 2014-3-24 19:18 Sample Weight: 1.0000  
 Run Time (min): 19.00 Sample Amount: 1.0000

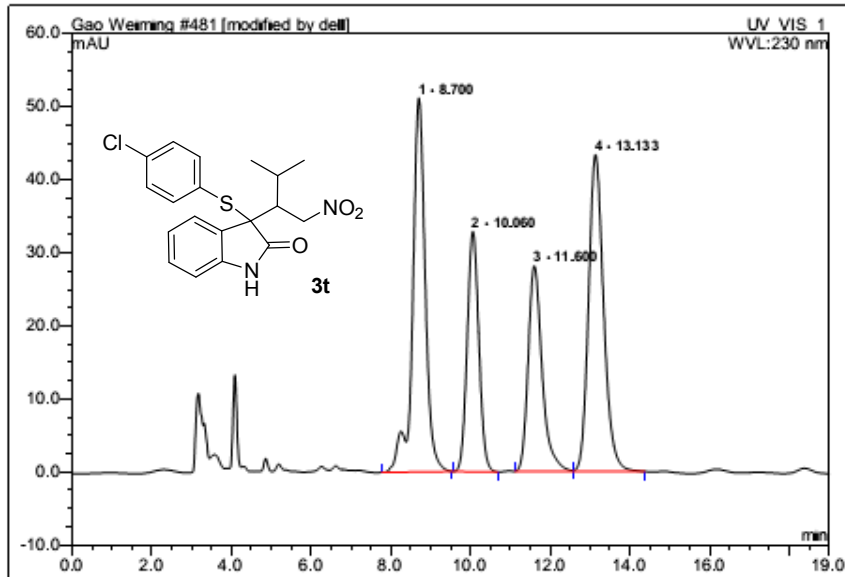

| No.           | Ret.Time min | Peak Name | Height mAU | Area mAU*min | Rel.Area % | Amount | Type |
|---------------|--------------|-----------|------------|--------------|------------|--------|------|
| 1             | 8.70         | n.a.      | 51.250     | 18.876       | 31.18      | n.a.   | BMB* |
| 2             | 10.06        | n.a.      | 32.929     | 11.178       | 18.46      | n.a.   | BMB  |
| 3             | 11.60        | n.a.      | 28.137     | 11.457       | 18.92      | n.a.   | BM   |
| 4             | 13.13        | n.a.      | 43.403     | 19.030       | 31.43      | n.a.   | MB   |
| <b>Total:</b> |              |           | 155.719    | 60.542       | 100.00     | 0.000  |      |

### 480 GWM-GF-017-asy-IF-90/10-1.0-230

Sample Name: GWM-GF-017-asy-IF-90/10-1.0-230 Injection Volume: 20.0  
 Vial Number: 578 Channel: UV\_VIS\_1  
 Sample Type: standard Wavelength: 230  
 Control Program: Gao Weiming Bandwidth: n.a.  
 Quantif. Method: Gao Weiming Dilution Factor: 1.0000  
 Recording Time: 2014-3-24 18:57 Sample Weight: 1.0000  
 Run Time (min): 15.65 Sample Amount: 1.0000

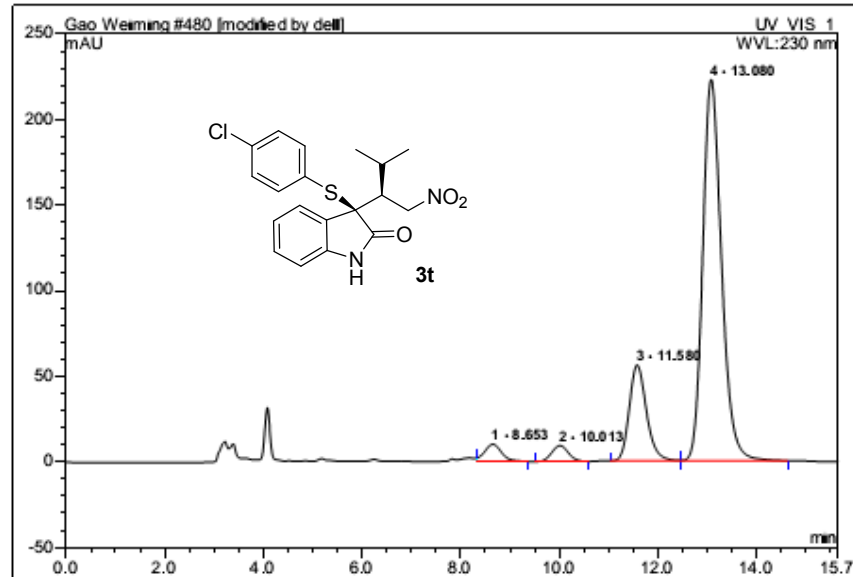

| No.           | Ret.Time min | Peak Name | Height mAU | Area mAU*min | Rel.Area % | Amount | Type |
|---------------|--------------|-----------|------------|--------------|------------|--------|------|
| 1             | 8.65         | n.a.      | 10.048     | 4.036        | 3.15       | n.a.   | MB*  |
| 2             | 10.01        | n.a.      | 9.315      | 3.618        | 2.82       | n.a.   | BMB* |
| 3             | 11.58        | n.a.      | 55.863     | 22.478       | 17.55      | n.a.   | BMB* |
| 4             | 13.08        | n.a.      | 222.688    | 97.971       | 76.48      | n.a.   | bMB* |
| <b>Total:</b> |              |           | 297.913    | 128.103      | 100.00     | 0.000  |      |

### 479 GWM-GF-019-rac-IF-90/10-1.0-230

**Sample Name:** GWM-GF-019-rac-IF-90/10-1.0-230      **Injection Volume:** 20.0  
**Vial Number:** 577      **Channel:** UV\_VIS\_1  
**Sample Type:** standard      **Wavelength:** 230  
**Control Program:** Gao Weiming      **Bandwidth:** n.a.  
**Quantif. Method:** Gao Weiming      **Dilution Factor:** 1.0000  
**Recording Time:** 2014-3-24 18:26      **Sample Weight:** 1.0000  
**Run Time (min):** 20.47      **Sample Amount:** 1.0000

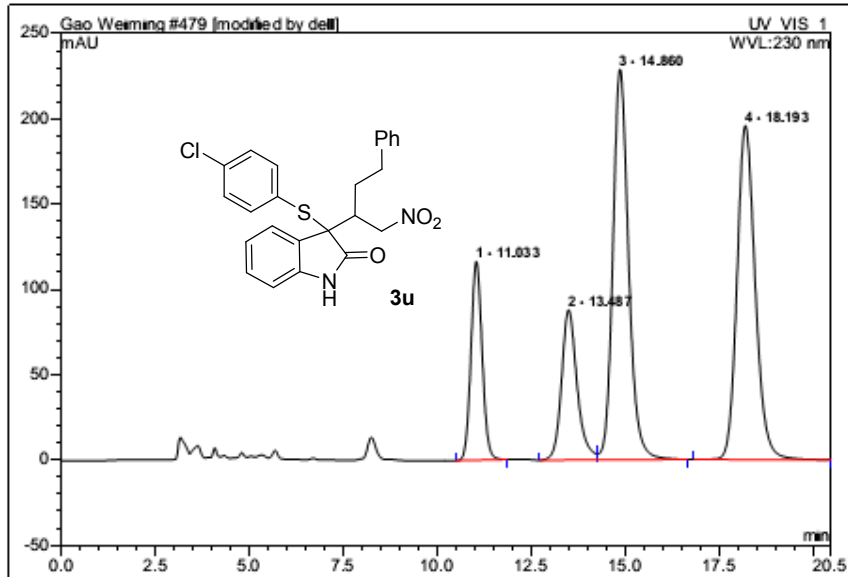

| No.           | Ret.Time<br>min | Peak Name | Height<br>mAU | Area<br>mAU*min | Rel.Area<br>% | Amount | Type |
|---------------|-----------------|-----------|---------------|-----------------|---------------|--------|------|
| 1             | 11.03           | n.a.      | 116.501       | 40.261          | 13.24         | n.a.   | BMB  |
| 2             | 13.49           | n.a.      | 87.999        | 42.334          | 13.92         | n.a.   | BM   |
| 3             | 14.86           | n.a.      | 228.963       | 110.931         | 36.49         | n.a.   | MB   |
| 4             | 18.19           | n.a.      | 195.795       | 110.491         | 36.34         | n.a.   | BMB  |
| <b>Total:</b> |                 |           | 629.258       | 304.016         | 100.00        | 0.000  |      |

### 478 GWM-GF-019-asy-IF-90/10-1.0-230

**Sample Name:** GWM-GF-019-asy-IF-90/10-1.0-230      **Injection Volume:** 20.0  
**Vial Number:** 576      **Channel:** UV\_VIS\_1  
**Sample Type:** standard      **Wavelength:** 230  
**Control Program:** Gao Weiming      **Bandwidth:** n.a.  
**Quantif. Method:** Gao Weiming      **Dilution Factor:** 1.0000  
**Recording Time:** 2014-3-24 18:02      **Sample Weight:** 1.0000  
**Run Time (min):** 20.28      **Sample Amount:** 1.0000

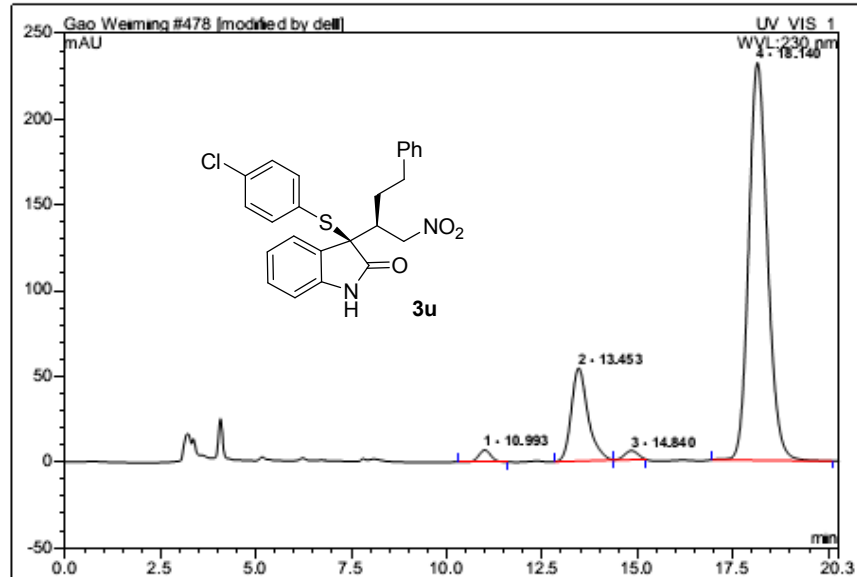

| No.           | Ret.Time<br>min | Peak Name | Height<br>mAU | Area<br>mAU*min | Rel.Area<br>% | Amount | Type |
|---------------|-----------------|-----------|---------------|-----------------|---------------|--------|------|
| 1             | 10.99           | n.a.      | 6.822         | 2.430           | 1.48          | n.a.   | BMB* |
| 2             | 13.45           | n.a.      | 54.150        | 27.494          | 16.74         | n.a.   | BMB* |
| 3             | 14.84           | n.a.      | 5.264         | 2.138           | 1.30          | n.a.   | BMB* |
| 4             | 18.14           | n.a.      | 231.946       | 132.170         | 80.48         | n.a.   | BMB* |
| <b>Total:</b> |                 |           | 298.183       | 164.233         | 100.00        | 0.000  |      |
